# **Evaluation of parameters affecting performance and reliability of machine learning-based antibiotic susceptibility testing from whole genome sequencing data**

Allison L. Hicks<sup>1,\*</sup>, Nicole Wheeler<sup>2</sup>, Leonor Sánchez-Busó<sup>3</sup>, Jennifer L. Rakeman<sup>4</sup>, Simon R. Harris<sup>3</sup>, Yonatan H. Grad<sup>1,5,\*</sup>

<sup>1</sup> Department of Immunology and Infectious Diseases, Harvard T. H. Chan School of Public Health, Boston, Massachusetts 02115

<sup>2</sup> Centre for Genomic Pathogen Surveillance, Wellcome Sanger Institute, Wellcome Genome Campus, Hinxton, Cambridgeshire, UK

<sup>3</sup> Pathogen Genomics, Wellcome Sanger Institute, Wellcome Genome Campus, Hinxton, Cambridgeshire, UK

<sup>4</sup> Public Health Laboratory, Division of Disease Control, New York City Department of Health and Mental Hygiene, New York City, New York 10016

<sup>5</sup> Division of Infectious Diseases, Department of Medicine, Brigham and Women's Hospital, Harvard Medical School, Boston, Massachusetts 02115

\* Corresponding authors: [allison\\_hicks@g.harvard.edu](mailto:allison_hicks@g.harvard.edu), [ygrad@hsph.harvard.edu](mailto:ygrad@hsph.harvard.edu)

# **Abstract:**

Prediction of antibiotic resistance phenotypes from whole genome sequencing data by machine learning methods has been proposed as a promising platform for the development of sequence-based diagnostics. However, there has been no systematic evaluation of factors that may influence performance of such models, how they might apply to and vary across clinical populations, and what the implications might be in the clinical setting. Here, we performed a meta-analysis of seven large *Neisseria gonorrhoeae* datasets, as well as *Klebsiella pneumoniae* and *Acinetobacter baumannii* datasets, with whole genome sequence and antibiotic susceptibility phenotypes using set covering machine classification, random forest classification, and random forest regression models to predict resistance phenotypes from genotype. We demonstrate how model performance varies by drug, dataset, resistance metric, accuracy metric, and species, reflecting the complexities of generating clinically relevant conclusions from machine learning-derived models. Our findings underscore the importance of incorporating relevant biological and epidemiological knowledge into model design and assessment and suggest that doing so can inform tailored modeling for individual drugs, pathogens, and clinical populations. We further suggest that continued comprehensive sampling and incorporation of up-to-date whole genome sequence data, resistance phenotypes, and treatment outcome data into model training will be crucial to the clinical utility and sustainability of machine learning-based molecular diagnostics.

# Introduction:

At least 700,000 deaths annually can be attributed to antimicrobial resistant (AMR) infections, and, without intervention, the annual AMR-associated mortality is estimated to climb to 10 million in the next 35 years<sup>1</sup>. As most patients are still treated based on empirical diagnosis rather than confirmation of the causal agent or its drug susceptibility profile, development of improved, rapid diagnostics enabling tailored therapy represents a clear actionable intervention<sup>1</sup>. The Cepheid GeneXpert MTB/RIF assay, for example, has been widely adopted for rapid point-of-care detection of *Mycobacterium tuberculosis* (TB) and rifampicin (RIF) resistance<sup>2</sup>, and the SpeeDx ResistancePlus GC assay used to detect both *Neisseria gonorrhoeae* and ciprofloxacin (CIP) susceptibility was recently approved for marketing as an *in vitro* diagnostic in Europe.

Molecular assays offer improved speed compared to gold-standard phenotypic tests and are of particular interest because of their promise of high accuracy for the prediction of AMR phenotype based on genotype<sup>2,3</sup>. Approaches for predicting resistance phenotypes from genetic features include direct association (i.e., using the presence or absence of genetic variants known to be associated with resistance to infer a resistance phenotype) and the application of predictive models derived from machine learning (ML) algorithms. Direct association approaches can offer simple, inexpensive, and often highly accurate resistance assays for some drugs/species<sup>2</sup> and may even provide more reliable predictions of resistance phenotype than phenotypic testing<sup>4-6</sup>. However, these approaches are limited by the availability of well-curated and up-to-date panels of resistance variants, as well as the diversity and complexity of resistance mechanisms. ML strategies can facilitate modeling of more complex, diverse, and/or under-

characterized resistance mechanisms, thus outperforming direct association for many drugs/species<sup>7-9</sup>. With the increasing speed and decreasing cost of sequencing and computation, ML approaches can be applied to genome-wide feature sets<sup>8,10-18</sup>, ideally obviating the need for comprehensive *a priori* knowledge of resistance loci.

While prediction of antibiotic resistance phenotypes from ML-derived models based on genomic features has become increasingly prominent as a promising diagnostic tool<sup>8,11-15,17</sup>, there has been no systematic evaluation of factors that may influence performance of such models and their implications in the clinical setting. The extent to which ML model accuracy varies by antibiotic is unclear, as is the impact of sampling bias on model performance. It is further unclear what the most relevant resistance metric (i.e., minimum inhibitory concentration [MIC] or categorical report of susceptibility) for such a diagnostic might be, how models derived from different methods should be evaluated, and how amenable different species might be to genotype-to-phenotype modeling of antibiotic resistance.

We used set covering machine (SCM)<sup>19</sup> and random forest (RF)<sup>20</sup> classification as well as RF regression algorithms to build and test predictive models with seven gonococcal datasets for which whole genome sequences (WGS) and ciprofloxacin (CIP) and azithromycin (AZM) MICs were available. AZM is currently part of the recommended treatment regimen for gonococcal infections, and with the development of resistance diagnostics, CIP may represent a viable treatment option<sup>21-23</sup>. While the majority of CIP resistance in gonococci can be attributed to *gyrA* mutations, AZM resistance is associated with more diverse and complex resistance mechanisms<sup>23,24</sup>, offering an opportunity to evaluate ML methods across drugs with distinct pathways to resistance. The range of

datasets and sampling frames enables assessment of sampling bias on model reliability. Further, the availability of MICs, as well as distinct EUCAST and CLSI breakpoints, for these drugs allows for evaluation of predictive models based on different resistance metrics and of the implications of different model performance metrics in the clinical setting. Finally, extension of these analyses to *Klebsiella pneumoniae* and *Acinetobacter baumannii* datasets for which WGS and CIP MICs were available allows for assessment of model performance for the same drug in species with open pangenomes.

Our results demonstrate that using ML to predict antibiotic resistance phenotypes from WGS data yields variable results across drugs, datasets, resistance metrics, metrics of model performance, and species. Ultimately, we suggest that tailored modeling for individual drugs, species, and clinical populations may be necessary to successfully leverage these ML-based approaches as diagnostic tools. We further suggest that continuing surveillance, isolate collection, and reporting of WGS, MIC phenotypes, and treatment outcomes will be crucial to the sustainability of any such molecular diagnostics.

## Methods:

### Isolate selection and dataset preparation

See **Table 1** for details of the datasets assessed. All gonococcal datasets contained a minimum of 200 isolates with WGS (Illumina MiSeq, HiSeq, or NextSeq) and MICs available for both CIP and AZM (by agar dilution and/or Etest). Isolates lacking CIP and AZM MIC data were excluded. MIC testing methods varied within datasets, as reported<sup>10-13,17,18,25</sup>.

*K. pneumoniae* and *A. baumannii* datasets were selected based on the availability of isolates collected during a single survey that were tested for CIP susceptibility and whole genome sequenced using consistent platforms (in both cases, the BD-Phoenix system and either Illumina MiSeq or NextSeq).

MIC data were obtained from the associated publications, except in the cases of dataset 1 (NCBI Bioproject PRJEB10016; see **Supplementary Table 1**) and dataset 9, which were obtained from the NCBI BioSample database (<https://www.ncbi.nlm.nih.gov/biosample>). Raw sequence data were downloaded from the NCBI Sequence Read Archive (<https://www.ncbi.nlm.nih.gov/sra>). Genomes were assembled using SPAdes<sup>26</sup> with default parameters, and assembly quality was assessed using QUAST<sup>27</sup>. Contigs <200 bp in length and/or with <10x coverage were removed. Isolates with assembly N50s below two standard deviations of the dataset mean were removed.

## **Evaluation of known resistance variants**

Previously identified genetic loci associated with reduced susceptibility to CIP or AZM in gonococci are indicated in **Supplementary Tables 2** and **3**, respectively. The sequences of these loci were extracted from the gonococcus genome assemblies using BLAST<sup>28</sup> followed by MUSCLE alignment<sup>29</sup> to assess the presence or absence of known resistance variants. The presence or absence of quinolone resistance determining mutations in *gyrA* was similarly assessed in *K. pneumoniae* and *A. baumannii* assemblies. Presence or absence of gonococcal AZM resistance mutations in the multi-copy 23S rRNA gene was assessed using BWA-MEM<sup>30</sup> to map raw reads to a single 23S rRNA allele from the NCCP11945 reference isolate (NGK\_rna23s4), the Picard toolkit

(<http://broadinstitute.github.io/picard>) to identify duplicate reads, and Pilon<sup>31</sup> to determine the mapping quality-weighted percentage of each nucleotide at the sites of interest.

# **ML-based prediction of resistance phenotypes**

Predictive modeling was carried out using SCM and RF algorithms, implemented in the Kover<sup>11,12</sup> and ranger<sup>32</sup> packages, respectively. K-mer profiles used for model training and prediction were generated from the assemblies using the DSK k-mer counting software<sup>33</sup> with k=31, a length commonly used in bacterial genomic analysis<sup>11,12,34,35</sup>. For each SCM binary classification analysis (using S/NS phenotypes based on the two different breakpoints for each drug), the best conjunctive and/or disjunctive model was selected using five-fold cross-validation, testing the suggested broad range of values for the trade-off hyperparameter of 0.1, 0.178, 0.316, 0.562, 1.0, 1.778, 3.162, 5.623, 10.0, and 999999.0 to determine the optimal rule scoring function ([http://aldro61.github.io/kover/doc\\_learning.html](http://aldro61.github.io/kover/doc_learning.html)) with default parameters. In order to assess binary classification across multiple methods, RF was also used to build binary classifiers (RF-C) using S/NS phenotypes. Further, to compare performance of binary classifiers to MIC prediction models, RF was used to build multi-class classification (RF-mC) and regression (RF-R) models based on log<sub>2</sub>(MIC) data. For all RF analyses, forests were grown to 1000 trees of unlimited depth using node impurity to assess variable importance using default parameters.

The set of SCM and RF analyses performed are indicated in **Supplementary Tables 4 and 5**. For each of the seven individual gonococcal datasets, as well as the aggregate gonococcal dataset and the *K. pneumoniae* and *A. baumannii* datasets,

training sets consisted of random sub-samples of two-thirds of isolates from the dataset indicated (maintaining proportions of each resistance phenotype from the original dataset), while the remaining isolates were used to test performance of the model. Each set of analyses (for each combination of dataset/drug/resistance metric/ML algorithm) was performed on 10 replicates, each with a unique randomly partitioned training and testing set. For all gonococcal datasets, separate models were trained and tested using the EUCAST<sup>36</sup> and CLSI<sup>37</sup> breakpoints for non-susceptibility (NS) to CIP. Four of the *N. gonorrhoeae* datasets had insufficient (<15) NS isolates by the CLSI breakpoint for AZM non-susceptibility<sup>37</sup> and thus were only assessed at the EUCAST AZM breakpoint. CIP MICs for the *K. pneumoniae* isolates were not available in the range of the EUCAST breakpoint (0.25 µg/mL), and thus only the CLSI breakpoint for NS was assessed. For *A. baumannii*, the EUCAST and CLSI breakpoints for ciprofloxacin NS are the same (>1 µg/mL). Due to the very limited range of MICs within the BD-Phoenix testing thresholds and thus the CIP MICs available for *K. pneumoniae* and *A. baumannii*, predictive models based on MICs were not generated for these species.

Model performance was assessed by sensitivity (1 – very major error [VME] rate), specificity (1 – major error [ME] rate), and the aggregate balanced accuracy (bACC). For MIC prediction models, the percentage of isolates with predicted MICs exactly matching the phenotypic MICs (rounding to the nearest doubling dilution, in the case of regression models), as well as the percentage of isolates with predicted MICs within one doubling dilution of phenotypic MICs (1-tier accuracy), were also assessed. Mean and 95% confidence intervals for all metrics were calculated across the 10 replicates for each analysis. Differential model performance between datasets or methods was evaluated by



comparing mean bACC between sets of replicates by two-tailed t-tests ( $\alpha=0.05$ ). Relationships between MIC prediction accuracy and bACC and between dataset imbalance and model performance were assessed by Pearson correlation ( $\alpha=0.05$ ).

## Results:

### Accuracy of ML-based prediction of resistance phenotypes varies by antibiotic.

Given the distinct MIC distributions and distinct pathways to resistance for CIP and AZM in gonococci, these two drugs enable evaluation of drug-specific performance of ML-based resistance prediction models. CIP MICs in surveys of clinical gonococcal isolates are bimodally distributed, with the majority of isolates having MICs well above or below the NS breakpoints, while the majority of reported AZM MICs in gonococci are closer to the NS breakpoints (<https://mic.eucast.org/Eucast2>). These trends were recapitulated in the gonococcal isolates assessed here (**Fig. 1a-b**). Further, the vast majority of CIP resistance in gonococci observed to date is explained by mutations in *gyrA* and *parC* and has spread predominantly through clonal expansion, generally resulting in MICs  $\geq 1$   $\mu\text{g/mL}$ <sup>23,38</sup>. In contrast, AZM resistance in gonococci has arisen many times *de novo* through multiple pathways, many of which remain under-characterized and are associated with lower-level resistance<sup>23,38,39</sup>. As expected, the GyrA S91F mutation alone predicts NS to CIP by both EUCAST and CLSI breakpoints in the aggregate gonococcal dataset assessed here with  $\geq 98\%$  sensitivity and  $\geq 99\%$  specificity (**Supplementary Table 2**). AZM NS showed lower values for these metrics, indicating it was not as well explained by known resistance variants, with extensive contributions from uncharacterized mechanisms and/or multifactorial interactions (**Supplementary Table 3**).

We next trained and evaluated ML-based predictive models for CIP and AZM resistance in gonococci (**Supplementary Table 4**). By all ML methods and breakpoints, CIP NS was predicted with significantly higher bACC than AZM NS in the aggregate gonococcal dataset ( $P < 0.0001$ , **Fig. 1c-d**), as well as in individual gonococcal datasets ( $P < 0.0001$ , **Supplementary Tables 6-7**). While CIP NS was predicted with mean bACC  $\geq 96\%$  across all methods, breakpoints, and datasets, mean bACC for AZM NS classification ranged from 62% to 92%, varying by method, breakpoint, and dataset. As variable model performance across different drugs has previously been attributed to variations in representation of susceptible (S) or NS isolates<sup>7,14,15</sup>, it is worth noting that by the EUCAST breakpoints, the aggregate gonococcal dataset, as well as some of the individual datasets, had nearly identical proportions of S and NS isolates between CIP and AZM, demonstrating that variable representation of S or NS isolates alone cannot explain reduced performance of AZM models compared to CIP.

# **Sampling bias in training and testing data skews resistance model performance.**

The diversity of resistance mechanisms for AZM in gonococci offers an opportunity to evaluate the effects of sampling bias on model performance. The sampling frames for the seven gonococcal datasets ranged geographically from citywide to international and temporally from a single year to >20 years (**Table 1**), and several datasets were enriched for AZM resistance<sup>11,25</sup>. The distributions of both AZM MICs and known resistance mechanisms across datasets (**Fig. 1b**, **Supplementary Table 3**) and the variable performance of AZM resistance models across datasets (**Supplementary Table 7**) suggest that AZM resistance mechanisms are differentially distributed across the

sampld clinical populations. To assess the impact of sampling on model reliability, the performance of RF classifiers in prediction of AZM NS phenotypes were compared across multiple training and testing sets. These include classifiers trained on subsamples of isolates from a single dataset, classifiers trained on the aggregate gonococcal dataset, and classifiers trained on the aggregate gonococcal dataset excluding isolates from the same dataset as the testing set (**Supplementary Table 5**). Given the low representation of AZM NS strains by the CLSI breakpoint in many datasets, these analyses were only performed using the EUCAST breakpoint.

While it may be assumed that increased availability of paired genomic and phenotypic resistance data from a broader range of clinical populations will facilitate more accurate and reliable modeling<sup>40</sup>, our results demonstrate that in predicting AZM resistance phenotypes for isolates from most datasets (with the exception of datasets 2 and 5), performance of classifiers trained on the aggregate dataset was not significantly better than performance of classifiers trained only on isolates from the dataset from which the test isolates were derived ( $P < 0.0001$  and  $P = 0.002$  for datasets 2 and 5, respectively,  $P = 0.019$  for dataset 3, where the classifiers trains on the aggregate dataset had lower bACC than classifiers trained only on isolates from dataset 3, and  $P > 0.25$  for all other datasets, **Fig. 2a**). Further, there was substantial variation in performance of models trained on the aggregate dataset across testing sets, with models achieving significantly higher bACC for strains from datasets 3 and 4 than for strains from datasets 2 and 5 ( $P < 0.004$ , **Fig. 2a**), perhaps reflecting enrichment for AZM NS in these datasets (**Table 1**). Additionally, with the exception of dataset 5, performance of AZM resistance classifiers trained only on isolates from the dataset from which the test isolates were

derived was significantly higher than performance of classifiers trained on the aggregate dataset excluding isolates from the test dataset ( $P = 0.392$  for dataset 5,  $P < 0.01$  for all other datasets, **Fig. 2a**).

Performance of RF classifiers trained and tested on dataset 2 was limited by low specificity, which was improved in models trained on the aggregate dataset (**Fig. 2b**). The low specificity achieved by RF classifiers trained and tested on this dataset is likely due to the low representation of S strains, most of which were within one doubling dilution of the NS breakpoint (**Fig. 2c**), and thus the more comprehensive representation of negative (S) data in the aggregate training set was associated with improved specificity. Conversely, performance of RF classifiers trained and tested on dataset 5 was more limited by low sensitivity, which was improved in models trained on the aggregate dataset (**Fig. 2b**). This dataset had a low representation of strains with high AZM MICs (**Fig. 2d**), and thus the more comprehensive representation of positive (NS) data in the aggregate training set was associated with improved sensitivity in predicting AZM NS for these strains. Low representation of strains with higher AZM MICs was also observed in other datasets (i.e., datasets 1, 6, and 7) and was similarly reflected in the sensitivity-limited performance of RF classifiers trained and tested on these datasets (**Supplementary Table 7**). However, AZM NS prediction accuracy for strains from these datasets was not improved by training classifiers on the aggregate dataset. These results demonstrate that resistance model performance may be strongly associated with the distributions of both resistance phenotypes and genetic features and thus can be highly population-specific.

## ML prediction models of antibiotic susceptibility / non-susceptibility outperform

### MIC models

Gonococcal CIP and AZM MICs were dichotomized by both EUCAST and CLSI breakpoints to assess the impact of variation in MIC breakpoints on model performance. As the EUCAST and CLSI breakpoints for CIP in gonococci are within a single doubling dilution and the vast majority of isolates have much lower or higher CIP MICs (**Fig. 1a**), >99% of isolates in the aggregate dataset were consistently S or NS by both breakpoints. Of the 23 isolates with MICs between the two breakpoints, 18 had MICs derived from Etests of 0.032 µg/mL or 0.047 µg/mL, making their classification relative to the EUCAST breakpoint of 0.03 µg/mL ambiguous. In contrast, the EUCAST and CLSI breakpoints for AZM in gonococci are separated by two doubling dilutions, and for many isolates, the AZM MIC was within this range (**Fig. 1b**). As such, only 67% of isolates in the aggregate dataset were consistently S or NS by both breakpoints. CIP NS classifier performance was either identical or nearly identical for both breakpoints in the aggregate and most individual gonococcal datasets (**Fig. 3a**). In contrast, the bACC of AZM NS prediction by both SCM and RF classifiers based on the CLSI breakpoint was significantly higher than for those based on the EUCAST breakpoint across all gonococcal datasets assessed by both breakpoints ( $P < 0.0001$ , **Fig. 3b**).

To assess the performance of MIC prediction models relative to binary S/NS resistance phenotype classifiers, RF-mC and RF-R models were trained and evaluated for CIP and AZM MIC prediction in gonococci. Average exact match rates between predicted and phenotypic MICs ranged from 63-86% and 53-77% by RF-mC and RF-R, respectively, for CIP, and from 22-58% and 44-64%, respectively, for AZM

**(Supplementary Tables 6-7).** Average 1-tier accuracies were substantially higher but similarly varied widely across datasets and between the two MIC prediction methods. There was no consistent or significant relationship across the different datasets between MIC prediction accuracy (exact match or 1-tier accuracy) and bACC for either drug by either MIC prediction method (**Fig. 3c-f**). Further, for both drugs by both breakpoints in the aggregate gonococcal dataset, binary RF-C models had equivalent or significantly higher bACC than RF-mC and RF-R MIC prediction models ( $P = 0.513$  for CIP NS by the CLSI breakpoint by RF-C compared to RF-R,  $P = 0.201$  for AZM NS by the CLSI breakpoint by RF-C compared to RF-R,  $P < 0.0006$  for all others, **Supplementary Tables 6-7**).

### **Model performance varies substantially across performance metrics**

Success in the predictive accuracy of ML models varies not only by antibiotic, dataset, and ML method, but also by metrics used to assess model performance<sup>7-12,14,15,17,25,41</sup>. To assess the advantages and limitations of model performance metrics and their implications for diagnostics, we examined the performance of predictive models for AZM resistance in gonococci across multiple metrics. Specifically, we evaluated accuracy (1 - error rate) compared to the bACC across all models for AZM S/NS based on the EUCAST breakpoint, and bACC was further compared to individual metrics of sensitivity (1 - VME rate) and specificity (1 - ME rate). Given the low representation of AZM NS strains by the CLSI breakpoint in most datasets, comparison of performance metrics was limited to models based on the EUCAST breakpoint.

Model accuracy was significantly higher than bACC for SCM and RF-C AZM resistance models in all gonococcal datasets ( $P < 0.0001$ ), except the aggregate dataset and dataset 6 ( $P > 0.40$ ), with a particularly marked discordance in datasets with unbalanced representation of S and NS phenotypes (**Fig 4a-c**). For example, in dataset 2, there were almost 5x as many AZM NS strains as S strains by the EUCAST breakpoint (**Fig. 4a, Supplementary Table 7**). While the mean error rate across the SCM replicates for this dataset based on this breakpoint was 15% (accuracy = 85%), this obscures the low specificity, which is better reflected in the mean bACC of 62%. However, even normalized aggregate metrics, such as bACC, can fail to reflect differences in sensitivity vs. specificity across models (**Fig. 4d-e**). For example, models trained and tested on dataset 1 had significantly higher bACC across both ML methods than models from dataset 2 ( $P < 0.0001$ ), while the models from the dataset 2 had 38-47% higher sensitivity. For both SCM and RF-C AZM resistance models, there was a significant positive correlation between the ratio of model sensitivity to model specificity and the ratio of NS to S strains in the dataset (Pearson  $r > 0.98$ ,  $P < 0.0001$  for both SCM and RF-C, **Fig. 4f**).

### **Species with large accessory genomes pose challenges to ML-based antibiotic resistance prediction**

Increasing pangenome size, or increasing ratio of genomic features to observations, may present an additional challenge for ML-based prediction of antibiotic resistance<sup>12</sup>. To investigate the impact of pangenome size on ML-based antibiotic resistance prediction, SCM and RF-C were used to model CIP NS in *K. pneumoniae* and *A. baumannii*, two

species with pangenomes several times that of gonococci (**Fig. 5a-b**). SCM classifiers trained on and used to predict CIP NS for *K. pneumoniae* and *A. baumannii* achieved significantly lower or roughly equivalent accuracy, respectively, as the gonococcal datasets ( $P < 0.0001$  and  $P > 0.06$  for *K. pneumoniae* and *A. baumannii*, respectively, **Fig. 5c**), and the performance of RF-C models was significantly lower for both *K. pneumoniae* and *A. baumannii* ( $P < 0.0001$ , **Fig. 5d**). Direct association based on GyrA codon 83 mutations (equivalent to codon 91 in gonococci) alone predicted CIP NS in *K. pneumoniae* with 86% sensitivity and 99% specificity, and thus had a marginally higher bACC (92.5%) than for the SCM classifiers and a substantially higher bACC than the RF classifiers. Similarly, for *A. baumannii*, GyrA codon 81 mutations (equivalent to codon 91 in gonococci) alone predicted CIP NS in with 97% sensitivity and 98% specificity, and thus with a roughly equivalent bACC (97.5%) to the SCM classifiers and a substantially higher bACC than the RF classifiers.

## Discussion

ML offers an opportunity to leverage WGS data to aid in development of rapid molecular diagnostics, but multiple factors affect model performance, reliability, and interpretability. Our results affirmed that drugs associated with complex and/or diverse resistance mechanisms present challenges to ML-based prediction of resistance phenotypes, and sampling frame can substantially affect performance of such predictive models. We demonstrated significant variability in performance and potential clinical utility of predictive models based on different resistance metrics, as well as in the information



provided by, and thus the clinical applicability of, commonly used metrics of model performance. We further showed that the capacity to model antibiotic resistance may be highly variable across different species.

# **Variable performance of ML-based resistance prediction models by antibiotic**

Genotype-based resistance diagnostics have largely focused more on evaluating the presence of resistance determinants and less on predicting the susceptibility profile of a given isolate<sup>8</sup>. However, in clinical settings where the empirical presumption is of resistance, prediction that an isolate is susceptible to an antibiotic may be more important in guiding treatment decisions. As such, the clinical utility of a genotype-based resistance diagnostic may be determined by its capacity to accurately predict susceptibility phenotype for multiple drugs.

While variable performance of ML-based predictive models has been observed across different drugs<sup>7,8,10,11,14,15</sup>, it has often been attributed to dataset size and/or imbalance<sup>7,14,15</sup>. Further, while it is more difficult to predict resistance phenotypes from genotypes for drugs that are associated with unknown, multifactorial, and/or diverse resistance mechanisms than for drugs for which resistance can largely be attributed to a single variant<sup>14,25</sup>, this caveat has been presented specifically as a limitation of models based on known resistance loci in comparison to unbiased machine learning-based MIC prediction using genome-wide feature sets<sup>14</sup>. However, by comparing performance of predictive models based on genome-wide feature sets between CIP and AZM across multiple gonococcal datasets, we showed that even with relatively large and phenotypically balanced datasets, ML algorithms cannot necessarily be expected to

successfully model complex and/or diverse resistance mechanisms, particularly given that the representation of these resistance mechanisms in training datasets is *a priori* unknown.

## **Impact of demographic, geographic, and timeframe sampling bias on ML model predictions of antibiotic resistance**

Sampling bias presents a substantial challenge in any predictive modeling, and sampling from limited patient demographics or during limited time periods may have considerable effects on the distributions of resistance phenotypes and resistance mechanisms<sup>42,43</sup>. For example, in TB, the RpoB I491F mutation that has been associated with failure of commercial RIF resistance diagnostic assays, including the GeneXpert MTB/RIF assay, reportedly accounted for <5% of TB RIF resistance in most countries, but, in Swaziland was found to be present in up to 30% of MDR-TB<sup>44</sup>. Further, as the focus with statistical classifiers is building models from feature sets that can accurately predict an outcome, rather than understanding the association between each of the features and the outcome, potential confounding effects from factors such as population structure<sup>35,45,46</sup> or correlations among resistance profiles of different drugs<sup>13</sup> are rarely considered.

By comparing performance of AZM NS classifiers across multiple training and testing sets, we showed significant variation in performance of classifiers trained on a large and diverse global collection across testing sets from different sampling frames. In some cases of imbalanced datasets, models trained on datasets with a more comprehensive representation of resistance phenotypes improve prediction accuracy.

However, our results suggest that heavier sampling across more geographic regions cannot necessarily be expected to significantly improve model performance. This, together with decreased performance when excluding isolates from the dataset from which the isolates being tested were derived, suggests that factors such as population-specific resistance mechanisms, genetic divergence at resistance loci, and/or confounding effects may constrain model reliability across populations.

# **ML resistance prediction model performance varies by NS breakpoints and by categorical vs MIC-based resistance metrics**

While measurement of MICs is vital for surveillance and investigation of resistance mechanisms, resistance breakpoints that relate *in vitro* MIC measurements to expected treatment outcomes inform clinical decision-making. However, standard breakpoints for NS to a given drug in a given species are often informed less by treatment outcome data, but rather factors such as pharmacokinetics and MIC distributions that can fail to account for a variety of intra-host conditions that could influence drug efficacy<sup>47-50</sup>. Recent studies have shown that isolates that are classified as susceptible by standard breakpoints but have higher MICs are associated with a greater risk of treatment failure than isolates with lower MICs<sup>51</sup>. Further, resistance breakpoints and testing protocols can vary across different organizations, and thus incongruence across phenotypic information included in the training data may introduce additional sources of error in predictive modeling. By comparing performance of predictive models of CIP and AZM non-susceptibility based on EUCAST and CLSI breakpoints, we demonstrated breakpoint-specific performance of models. For CIP, such breakpoint-specific performance is likely largely attributable to

variations in MIC testing protocols and thus ambiguous classification of some strains by the EUCAST breakpoint. On the other hand, the substantially lower performance of all AZM models based on the EUCAST breakpoint compared to those based on the CLSI breakpoint suggests that many isolates with AZM MICs between the two breakpoints lack genetic signatures that contribute to high model performance. While the clinical relevance of AZM MICs between these two breakpoints in gonococci is unclear, these isolates may be more likely to be associated with AZM treatment failure than isolates with lower MICs, and thus evaluation of classifiers using only higher breakpoints may misrepresent their diagnostic value, particularly in the absence of sufficient treatment outcome data.

Models that predict MICs provide more refined output than a binary classifier but generally achieve low rates of exact matches between phenotypic and predicted MICs and even fairly variable 1-tier accuracies<sup>14,15,25</sup>. Given the noise in phenotypic MIC testing<sup>52</sup> and the potential lack of discriminating genetic features between isolates with MICs separated by 1-2 doubling dilutions<sup>14</sup>, MIC prediction models may be unlikely to provide much better resolution than binary S/NS classifiers. Further, even if MIC predictions could provide additional resolution, the most important criterion of such a diagnostic would likely still be its ability to correctly predict resistance phenotypes relative to a clinically relevant breakpoint. Thus, performance of MIC prediction models with respect to breakpoints may be the biggest determinant of their diagnostic utility. By building MIC prediction models for CIP and AZM in gonococci, we observed low rates of exact matches between phenotypic and predicted MICs and variable 1-tier accuracies, with no relationship between 1-tier accuracy and categorical agreement (i.e., prediction

accuracy relative to NS breakpoints). Further, binary classifiers performed equivalently or better than MIC prediction models.

# **The choice of model performance metrics can obscure shortcomings of resistance prediction models**

While performance can vary substantially across resistance prediction models built by different ML methods<sup>7,12,53</sup>, criteria for selecting a model with the greatest potential diagnostic value are seldom addressed. Performance assessments for resistance prediction models are frequently presented in terms of aggregate metrics, including accuracy (or error rate), area-under-the-ROC-curve (AUC), and 1-tier accuracy, and/or in terms of individual VME and ME rates (or the sensitivity and specificity, respectively)<sup>7-12,14,15,17,25,41</sup>. Aggregate metrics can be useful in providing a single intuitive measure of model performance. However, as previously noted, metrics such as 1-tier accuracy may not reflect model performance relative to utility as a diagnostic (i.e., what proportion of discrepancies between phenotypic and predicted MICs result in a VME or ME). Further, some of these metrics, such as accuracy (or error rate) and AUC, may provide skewed representations of model performance in the case of imbalanced datasets<sup>54</sup>. Comparisons of AZM NS classifier accuracy to bACC across each of the gonococcal datasets demonstrated that accuracy obscures performance deficiencies. However, even normalized aggregate metrics such as bACC can fail to capture potentially important differences in sensitivity vs. specificity (or VME vs. ME rates). Individual metrics of sensitivity and specificity provide more detailed information about the likelihood of different kinds of prediction failures, the differential importance of which is reflected in the

FDA guidelines for AMR diagnostics<sup>55</sup>. However, our results also illustrate that model sensitivity and specificity can be strongly influenced by dataset imbalance, ultimately suggesting that multiple metrics may be necessary to evaluate a model's clinical utility and that both comprehensive sampling and dataset pruning may be necessary to optimize model performance.

## **ML antibiotic resistance prediction model success varies by bacterial pangenome size**

Bacterial species with open pangenomes present further challenges to ML-based prediction of antibiotic resistance. Increased resistance mechanism complexity and greater inter-isolate variation in resistance mechanisms require more intensive sampling to capture a significant portion of the resistome<sup>56</sup>. On the technical side, even for heavily sampled species, when using whole genome feature sets, the number of genetic features (e.g., k-mers or SNPs) will always be much larger than the number of observations (isolates), increasing the risk of overfitting<sup>12</sup>. This can be particularly problematic in species with open pangenomes, as the ratio of genetic features to the number of genomes is larger and the number of unique genetic features per number of genomes does not plateau, even with heavy sampling. By comparing classifier performance in predicting CIP NS across gonococci, *K. pneumoniae*, and *A. baumannii*, we show that classifiers generally did not perform as well for species with open genomes (*K. pneumoniae* or *A. baumannii*) as for gonococci. Further, while a single GyrA mutation could explain the majority of CIP NS across all species evaluated here, unlike in gonococci and *A. baumannii* where this mutation explained  $\geq 97\%$  of CIP NS, 14% of CIP NS in *K.*

*pneumoniae* could not be explained by this mutation, suggesting increased CIP resistance mechanism diversity and/or complexity in this species. While increased sampling, different methods, and/or finer tuning of hyperparameters may yield increased prediction accuracy for drug resistance in species with open genomes (e.g., Nguyen et al., 2018 reported a mean bACC of 98.5% using a decision tree-based extreme gradient boosting regression model to predict CIP MICs for the *K. pneumoniae* strains assessed here<sup>14</sup>), our results demonstrate clear variation in potential limitations of genotype-to-resistance-phenotype models across different species.

Given the biological and epidemiological disparities associated with resistance to different drugs in different clinical populations and bacterial species, and their evident impact on performance of predictive models, successful implementation of genotype-based resistance diagnostics will likely require sustained comprehensive sampling, customized modeling, and incorporation of feedback mechanisms based on treatment outcome data. Further evaluation of additional ML methods and datasets may reveal more quantitative requirements and limitations associated with the application of genotype-to-resistance-phenotype predictive modeling in the clinical setting.

## Acknowledgements

ALH and YHG are supported by the Richard and Susan Smith Family Foundation (<http://www.smithfamilyfoundation.net/>) and a National Institutes of Health R01 AI132606 (<https://www.nih.gov/>). This work was also supported by Wellcome (grant 098051 to the Wellcome Sanger Institute). NEW was funded through National Institutes of Health grant U01CA207167. The funders had no role in study design, data collection and analysis,

decision to publish, or preparation of the manuscript. Its contents are solely the responsibility of the authors and do not necessarily represent the official views of the National Institutes of Health. We thank Jung-Eun Shin, Mark Labrador, and members of the Grad Lab for helpful discussion, and Julie Schillinger and Preeti Pathela for assistance identifying, selecting, and characterizing the isolates from New York City.

# **Author contributions**

ALH and YHG conceived of the study. ALH performed the analyses, and ALH and YHG drafted the manuscript. JLR provided samples, including culturing specimens, isolating DNA, and testing antibiotic susceptibility. ALH, YHG, LSB, and NW interpreted the data. All authors contributed to the writing of the manuscript.

# **References:**

- 1 The Review on Antimicrobial Resistance. 2016. Tackling drug-resistant infections globally: final report and recommendations. London, United Kingdom.
- 2 Zumla, A. *et al.* Rapid point of care diagnostic tests for viral and bacterial respiratory tract infections--needs, advances, and future prospects. *Lancet Infect Dis* **14**, 1123-1135, doi:10.1016/S1473-3099(14)70827-8 (2014).
- 3 Didelot, X., Bowden, R., Wilson, D. J., Peto, T. E. A. & Crook, D. W. Transforming clinical microbiology with bacterial genome sequencing. *Nat Rev Genet* **13**, 601-612, doi:10.1038/nrg3226 (2012).



- 4 Walker, T. M. *et al.* Whole-genome sequencing for prediction of Mycobacterium tuberculosis drug susceptibility and resistance: a retrospective cohort study. *Lancet Infect Dis* **15**, 1193-1202, doi:10.1016/S1473-3099(15)00062-6 (2015).
- 5 Rigouts, L. *et al.* Rifampin resistance missed in automated liquid culture system for Mycobacterium tuberculosis isolates with specific rpoB mutations. *J Clin Microbiol* **51**, 2641-2645, doi:10.1128/JCM.02741-12 (2013).
- 6 Mason, A. *et al.* Accuracy of Different Bioinformatics Methods in Detecting Antibiotic Resistance and Virulence Factors from Staphylococcus aureus Whole-Genome Sequences. *J Clin Microbiol* **56**, doi:10.1128/JCM.01815-17 (2018).
- 7 Yang, Y. *et al.* Machine learning for classifying tuberculosis drug-resistance from DNA sequencing data. *Bioinformatics* **34**, 1666-1671, doi:10.1093/bioinformatics/btx801 (2018).
- 8 Pesesky, M. W. *et al.* Evaluation of Machine Learning and Rules-Based Approaches for Predicting Antimicrobial Resistance Profiles in Gram-negative Bacilli from Whole Genome Sequence Data. *Front Microbiol* **7**, 1887, doi:10.3389/fmicb.2016.01887 (2016).
- 9 Li, Y. *et al.* Validation of beta-lactam minimum inhibitory concentration predictions for pneumococcal isolates with newly encountered penicillin binding protein (PBP) sequences. *BMC Genomics* **18**, 621, doi:10.1186/s12864-017-4017-7 (2017).
- 10 Bradley, P. *et al.* Rapid antibiotic-resistance predictions from genome sequence data for Staphylococcus aureus and Mycobacterium tuberculosis. *Nat Commun* **6**, 10063, doi:10.1038/ncomms10063 (2015).

564 11 Drouin, A. *et al.* Predictive computational phenotyping and biomarker discovery  
565 using reference-free genome comparisons. *BMC Genomics* **17**, 754,  
566 doi:10.1186/s12864-016-2889-6 (2016).

567 12 Drouin, A. *et al.* Interpretable genotype-to-phenotype classifiers with performance  
568 guarantees. *bioRxiv*, doi: <http://dx.doi.org/10.1101/388348> (2018).

569 13 Davis, J. J. *et al.* Antimicrobial Resistance Prediction in PATRIC and RAST. *Sci*  
570 *Rep* **6**, 27930, doi:10.1038/srep27930 (2016).

571 14 Nguyen, M. *et al.* Developing an in silico minimum inhibitory concentration panel  
572 test for *Klebsiella pneumoniae*. *Sci Rep* **8**, 421, doi:10.1038/s41598-017-18972-w  
573 (2018).

574 15 Nguyen, M. *et al.* Using machine learning to predict antimicrobial minimum  
575 inhibitory concentrations and associated genomic features for nontyphoidal  
576 *Salmonella*. *J Clin Microbiol*, doi:10.1101/380782 (2018).

577 16 Santerre, J. W., Davis, J. J., Xia, F. & Stevens, R. Machine Learning for  
578 Antimicrobial Resistance. *arXiv e-prints*, doi:arXiv:1607.01224 (2016).

579 17 Moradigaravand, D. *et al.* Prediction of antibiotic resistance in *Escherichia coli* from  
580 large-scale pan-genome data. *PLoS Comput Biol* **14**, e1006258,  
581 doi:10.1371/journal.pcbi.1006258 (2018).

582 18 Gordon, N. C. *et al.* Prediction of *Staphylococcus aureus* antimicrobial resistance  
583 by whole-genome sequencing. *J Clin Microbiol* **52**, 1182-1191,  
584 doi:10.1128/JCM.03117-13 (2014).

585 19 Marchland, M. & Shawe-Taylor, J. The set covering machine. *Journal of Machine*  
586 *Learning Research* **3**, 723-746 (2002).

- 20 Breiman, L. Random forests. *Machine Learning* **45**, 5-32 (2001).
- 21 Hemarajata, P., Yang, S., Soge, O. O., Humphries, R. M. & Klausner, J. D.  
Performance and Verification of a Real-Time PCR Assay Targeting the gyrA Gene  
for Prediction of Ciprofloxacin Resistance in *Neisseria gonorrhoeae*. *J Clin*  
*Microbiol* **54**, 805-808, doi:10.1128/JCM.03032-15 (2016).
- 22 Siedner, M. J. *et al.* Real-time PCR assay for detection of quinolone-resistant  
*Neisseria gonorrhoeae* in urine samples. *J Clin Microbiol* **45**, 1250-1254,  
doi:10.1128/JCM.01909-06 (2007).
- 23 Grad, Y. H. *et al.* Genomic Epidemiology of Gonococcal Resistance to Extended-  
Spectrum Cephalosporins, Macrolides, and Fluoroquinolones in the United States,  
2000-2013. *J Infect Dis* **214**, 1579-1587, doi:10.1093/infdis/jiw420 (2016).
- 24 Wadsworth, C. B., Arnold, B. J., Sater, M. R. A. & Grad, Y. H. Azithromycin  
Resistance through Interspecific Acquisition of an Epistasis-Dependent Efflux  
Pump Component and Transcriptional Regulator in *Neisseria gonorrhoeae*. *MBio*  
**9**, doi:10.1128/mBio.01419-18 (2018).
- 25 Eyre, D. W. *et al.* WGS to predict antibiotic MICs for *Neisseria gonorrhoeae*. *J*  
*Antimicrob Chemother* **72**, 1937-1947, doi:10.1093/jac/dkx067 (2017).
- 26 Bankevich, A. *et al.* SPAdes: a new genome assembly algorithm and its  
applications to single-cell sequencing. *J Comput Biol* **19**, 455-477,  
doi:10.1089/cmb.2012.0021 (2012).
- 27 Gurevich, A., Saveliev, V., Vyahhi, N. & Tesler, G. QUAST: quality assessment  
tool for genome assemblies. *Bioinformatics* **29**, 1072-1075,  
doi:10.1093/bioinformatics/btt086 (2013).

- 28 Altschul, S. F., Gish, W., Miller, W., Myers, E. W. & Lipman, D. J. Basic local alignment search tool. *J Mol Biol* **215**, 403-410, doi:10.1016/S0022-2836(05)80360-2 (1990).
- 29 Edgar, R. C. MUSCLE: multiple sequence alignment with high accuracy and high throughput. *Nucleic Acids Res* **32**, 1792-1797, doi:10.1093/nar/gkh340 (2004).
- 30 Li, H. Aligning sequence reads, clone sequences and assembly contigs with BWA-MEM. *arXiv e-prints*, doi:arXiv:1303.3997 (2013).
- 31 Walker, B. J. *et al.* Pilon: an integrated tool for comprehensive microbial variant detection and genome assembly improvement. *PLoS One* **9**, e112963, doi:10.1371/journal.pone.0112963 (2014).
- 32 Wright, M. N. & Ziegler, A. ranger: A Fast Implementation of Random Forests for High Dimensional Data in C++ and R. *Journal of Statistical Software* **77**, 1-17, doi:doi:10.18637/jss.v077.i01 (2017).
- 33 Rizk, G., Lavenier, D. & Chikhi, R. DSK: k-mer counting with very low memory usage. *Bioinformatics* **29**, 652-653, doi:10.1093/bioinformatics/btt020 (2013).
- 34 Earle, S. G. *et al.* Identifying lineage effects when controlling for population structure improves power in bacterial association studies. *Nat Microbiol* **1**, 16041, doi:10.1038/nmicrobiol.2016.41 (2016).
- 35 Lees, J. A. *et al.* Sequence element enrichment analysis to determine the genetic basis of bacterial phenotypes. *Nat Commun* **7**, 12797, doi:10.1038/ncomms12797 (2016).

- 36 The European Committee on Antimicrobial Susceptibility Testing. *Breakpoint tables for interpretation of MICs and zone diameters. Version 8.1, 2018*. URL: <http://www.eucast.org/>.
- 37 Clinical and Laboratory Standards Institute. CLSI M100: Performance Standards for Antimicrobial Susceptibility Testing, 29th Edition (2019).
- 38 Harris, S. R. *et al.* Public health surveillance of multidrug-resistant clones of *Neisseria gonorrhoeae* in Europe: a genomic survey. *Lancet Infect Dis* **18**, 758-768, doi:10.1016/S1473-3099(18)30225-1 (2018).
- 39 Yahara, K. *et al.* Genomic surveillance of *Neisseria gonorrhoeae* to investigate the distribution and evolution of antimicrobial-resistance determinants and lineages. *Microb Genom* **4**, doi:10.1099/mgen.0.000205 (2018).
- 40 Demczuk, W. *et al.* Genomic Epidemiology and Molecular Resistance Mechanisms of Azithromycin-Resistant *Neisseria gonorrhoeae* in Canada from 1997 to 2014. *J Clin Microbiol* **54**, 1304-1313, doi:10.1128/JCM.03195-15 (2016).
- 41 Niehaus, K. E., Walker, T. M., Crook, D. W. & Clifton, T. E. A. P. A. in *IEEE-EMBS International Conference on Biomedical and Health Informatics (BHI)* 618-621 (2014).
- 42 Olesen, S. W. *et al.* Azithromycin susceptibility in *Neisseria gonorrhoeae* and seasonal macrolide use. *J Infect Dis* **jiy551** (2018).
- 43 Unemo, M. & Shafer, W. M. Antibiotic resistance in *Neisseria gonorrhoeae*: origin, evolution, and lessons learned for the future. *Ann N Y Acad Sci* **1230**, E19-28, doi:10.1111/j.1749-6632.2011.06215.x (2011).

- 44 Andre, E. *et al.* Novel rapid PCR for the detection of Ile491Phe rpoB mutation of Mycobacterium tuberculosis, a rifampicin-resistance-conferring mutation undetected by commercial assays. *Clin Microbiol Infect* **23**, 267 e265-267 e267, doi:10.1016/j.cmi.2016.12.009 (2017).
- 45 Zhou, X. & Stephens, M. Genome-wide efficient mixed-model analysis for association studies. *Nat Genet* **44**, 821-824, doi:10.1038/ng.2310 (2012).
- 46 Farhat, M. R. *et al.* Genomic analysis identifies targets of convergent positive selection in drug-resistant Mycobacterium tuberculosis. *Nat Genet* **45**, 1183-1189, doi:10.1038/ng.2747 (2013).
- 47 Prideaux, B. *et al.* The association between sterilizing activity and drug distribution into tuberculosis lesions. *Nat Med* **21**, 1223-1227, doi:10.1038/nm.3937 (2015).
- 48 Tamma, P. D. *et al.* Outcomes of children with enterobacteriaceae bacteremia with reduced susceptibility to ceftriaxone: do the revised breakpoints translate to improved patient outcomes? *Pediatr Infect Dis J* **32**, 965-969, doi:10.1097/INF.0b013e31829043b3 (2013).
- 49 Bhat, S. V. *et al.* Failure of current cefepime breakpoints to predict clinical outcomes of bacteremia caused by gram-negative organisms. *Antimicrob Agents Chemother* **51**, 4390-4395, doi:10.1128/AAC.01487-06 (2007).
- 50 Tam, V. H. *et al.* Outcomes of bacteremia due to Pseudomonas aeruginosa with reduced susceptibility to piperacillin-tazobactam: implications on the appropriateness of the resistance breakpoint. *Clin Infect Dis* **46**, 862-867, doi:10.1086/528712 (2008).

- 51 Colangeli, R. *et al.* Bacterial Factors That Predict Relapse after Tuberculosis Therapy. *N Engl J Med* **379**, 823-833, doi:10.1056/NEJMoa1715849 (2018).
- 52 Humphries, R. M. *et al.* CLSI Methods Development and Standardization Working Group Best Practices for Evaluation of Antimicrobial Susceptibility Tests. *J Clin Microbiol* **56**, doi:10.1128/JCM.01934-17 (2018).
- 53 Chen, M. L. *et al.* Deep Learning Predicts Tuberculosis Drug Resistance Status from Whole-Genome Sequencing Data. *bioRxiv*, doi:<https://doi.org/10.1101/275628> (2018).
- 54 Jeni, L. A., Cohn, J. F. & De La Torre, F. in *2013 Humaine Association Conference on Affective Computing and Intelligent Interaction* 245-251 (2013).
- 55 FDA. Class II Special Controls Guidance Document: Antimicrobial Susceptibility Test (AST) Systems; Guidance for Industry and FDA (Food and Drug Administration, Rockville, MD, 2009).
- 56 Jeukens, J. *et al.* Genomics of antibiotic-resistance prediction in *Pseudomonas aeruginosa*. *Ann N Y Acad Sci*, doi:10.1111/nyas.13358 (2017).
- 57 De Silva, D. *et al.* Whole-genome sequencing to determine transmission of *Neisseria gonorrhoeae*: an observational study. *Lancet Infect Dis* **16**, 1295-1303, doi:10.1016/S1473-3099(16)30157-8 (2016).
- 58 Demczuk, W. *et al.* Whole-genome phylogenomic heterogeneity of *Neisseria gonorrhoeae* isolates with decreased cephalosporin susceptibility collected in Canada between 1989 and 2013. *J Clin Microbiol* **53**, 191-200, doi:10.1128/JCM.02589-14 (2015).

- 59 Lee, R. S. *et al.* Genomic epidemiology and antimicrobial resistance of *Neisseria*  
gonorrhoeae in New Zealand. *J Antimicrob Chemother* **73**, 353-364,  
doi:10.1093/jac/dkx405 (2018).
- 60 Lesho, E. P. *et al.* The antimicrobial resistance monitoring and research (ARMoR)  
program: the US Department of Defense response to escalating antimicrobial  
resistance. *Clin Infect Dis* **59**, 390-397, doi:10.1093/cid/ciu319 (2014).

## Tables and Figures:

**Table 1.** Summary of datasets.

| Species               | Dataset | SRA Study ID/Reference                        | N <sub>samples</sub> | Temporal range | Geographic range               | Sampling approach                                                                                                                                                                                                                                   |
|-----------------------|---------|-----------------------------------------------|----------------------|----------------|--------------------------------|-----------------------------------------------------------------------------------------------------------------------------------------------------------------------------------------------------------------------------------------------------|
| <i>N. gonorrhoeae</i> | 1       | ERP011192                                     | 886                  | 2011-2015      | New York, NY (US)              | Survey from citywide clinics                                                                                                                                                                                                                        |
|                       | 2       | ERP008891, ERP001405, ERP000144 <sup>23</sup> | 1102                 | 2000-2013      | National (US)                  | Survey from nationwide clinics; male patients only; enriched for CFX resistance                                                                                                                                                                     |
|                       | 3       | SRP065041, ERP008891, SRP072971 <sup>25</sup> | 671                  | 2004-2014      | International (UK, Canada, US) | Surveys from Brighton, UK <sup>57</sup> and nationwide sites in Canada <sup>40,58</sup> and the US <sup>23</sup> ; Canadian samples enriched for CRO and AZM resistance; US samples enriched for CFX resistance; US samples from male patients only |
|                       | 4       | SRP050190, SRP065041 <sup>40,58</sup>         | 383                  | 1989-2014      | National (Canada)              | Surveys from nationwide sites in Canada; enriched for CRO and AZM resistance                                                                                                                                                                        |
|                       | 5       | ERP010312 <sup>38</sup>                       | 714                  | 2013           | International (Europe)         | Survey from clinics and hospitals across 21 European countries                                                                                                                                                                                      |
|                       | 6       | DRP004052 <sup>39</sup>                       | 204                  | 2015           | National (Japan)               | Survey from clinics in Kyoto and Osaka; male patients only                                                                                                                                                                                          |



|                      |   |                                                     |      |           |                        |                                                                               |
|----------------------|---|-----------------------------------------------------|------|-----------|------------------------|-------------------------------------------------------------------------------|
|                      | 7 | SRP111927 <sub>59</sub>                             | 398  | 2014-2015 | National (New Zealand) | Survey from nationwide diagnostic labs                                        |
| <i>K. pneumoniae</i> | 8 | SRP102664,<br>SRP110988,<br>SRP116139 <sub>14</sub> | 1560 | 2011-2017 | Houston, TX (US)       | Survey from citywide hospital system; enriched for $\beta$ -lactam resistance |
| <i>A. baumannii</i>  | 9 | SRP065910 <sub>60</sub>                             | 702  | 2000-2012 | National (US)          | Survey from clinics and hospitals within the US military healthcare system    |

CFX, cefixime; CRO, ceftriaxone; AZM, azithromycin

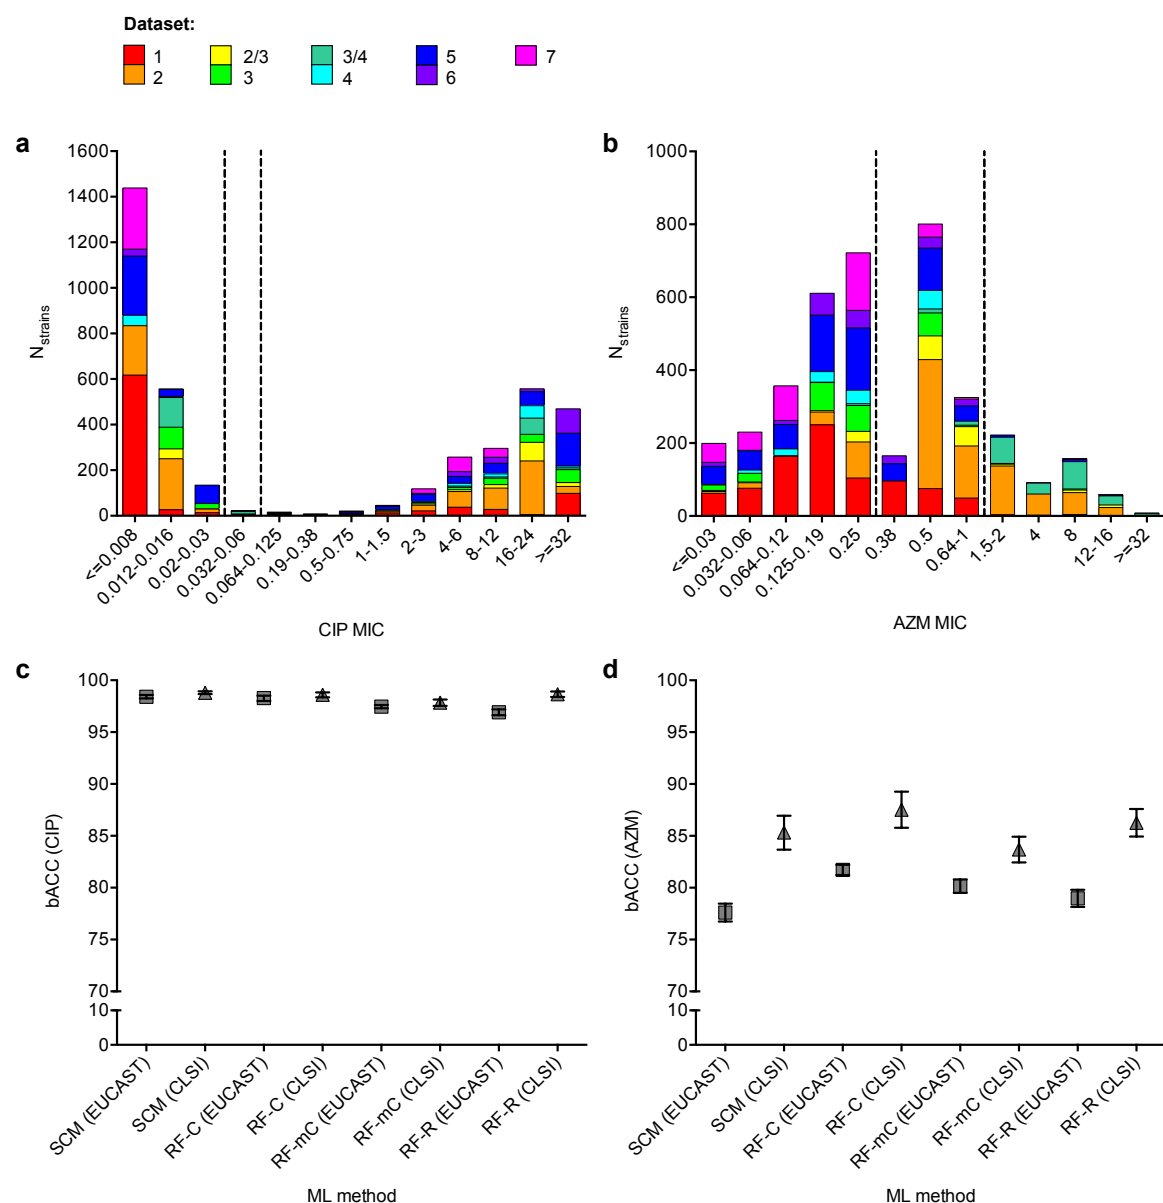

**Figure 1. Differential performance of machine learning-based prediction models for ciprofloxacin and azithromycin resistance in gonococci.** Histograms showing the distributions of (a) ciprofloxacin (CIP) and (b) azithromycin (AZM) MICs in the gonococcal isolates assessed here. Bar color indicates the study or studies associated with the isolates. Dashed lines indicate the (a) EUCAST and CLSI breakpoints for non-susceptibility (NS,  $>0.03 \mu\text{g/mL}$  and  $>0.06 \mu\text{g/mL}$ , respectively) for CIP and the (b)

718 EUCAST and CLSI breakpoints for non-susceptibility ( $>0.25 \mu\text{g/mL}$  and  $>1 \mu\text{g/mL}$ ,  
 719 respectively) for AZM. Mean balanced accuracy (bACC) with 95% confidence intervals of  
 720 predictive models for **(c)** CIP NS and **(d)** AZM NS trained and tested on the aggregate  
 721 gonococcal dataset. SCM, set covering machine; RF-C, random forest classification; RF-  
 722 mC, random forest multi-class classification; RF-R, random forest regression.

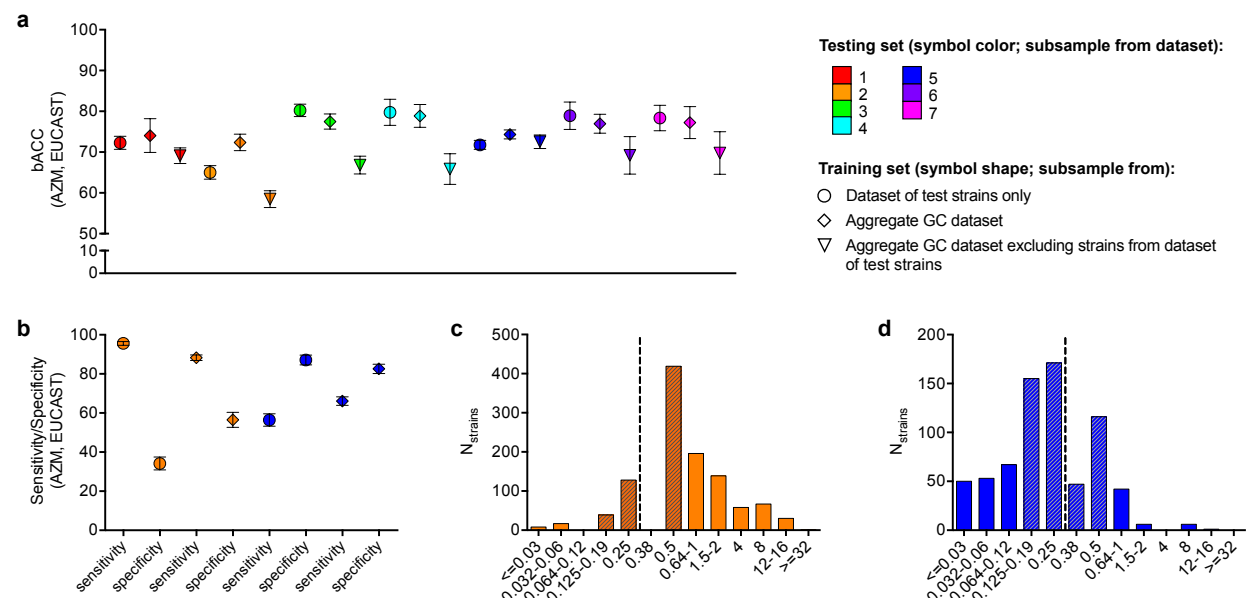

**Figure 2. Differential performance of random forest classifiers trained on different datasets.** (a) Mean balanced accuracy (bACC) with 95% confidence intervals of predictive models for gonococci (GC) azithromycin (AZM) non-susceptibility based on the EUCAST breakpoint. (b) Mean sensitivity and specificity with 95% confidence intervals of predictive models for GC AZM non-susceptibility in datasets 2 and 5. Histograms showing the distributions of AZM MICs in (c) dataset 2 and (d) dataset 5. Symbol colors in (a) and (b) indicate the dataset from which the testing set was derived, while symbol shape in (a) and (b) indicates the dataset from which the training set was derived. Hatching in (c) and (d) indicates MICs within one doubling dilution of the EUCAST breakpoint (designated by dashed lines).

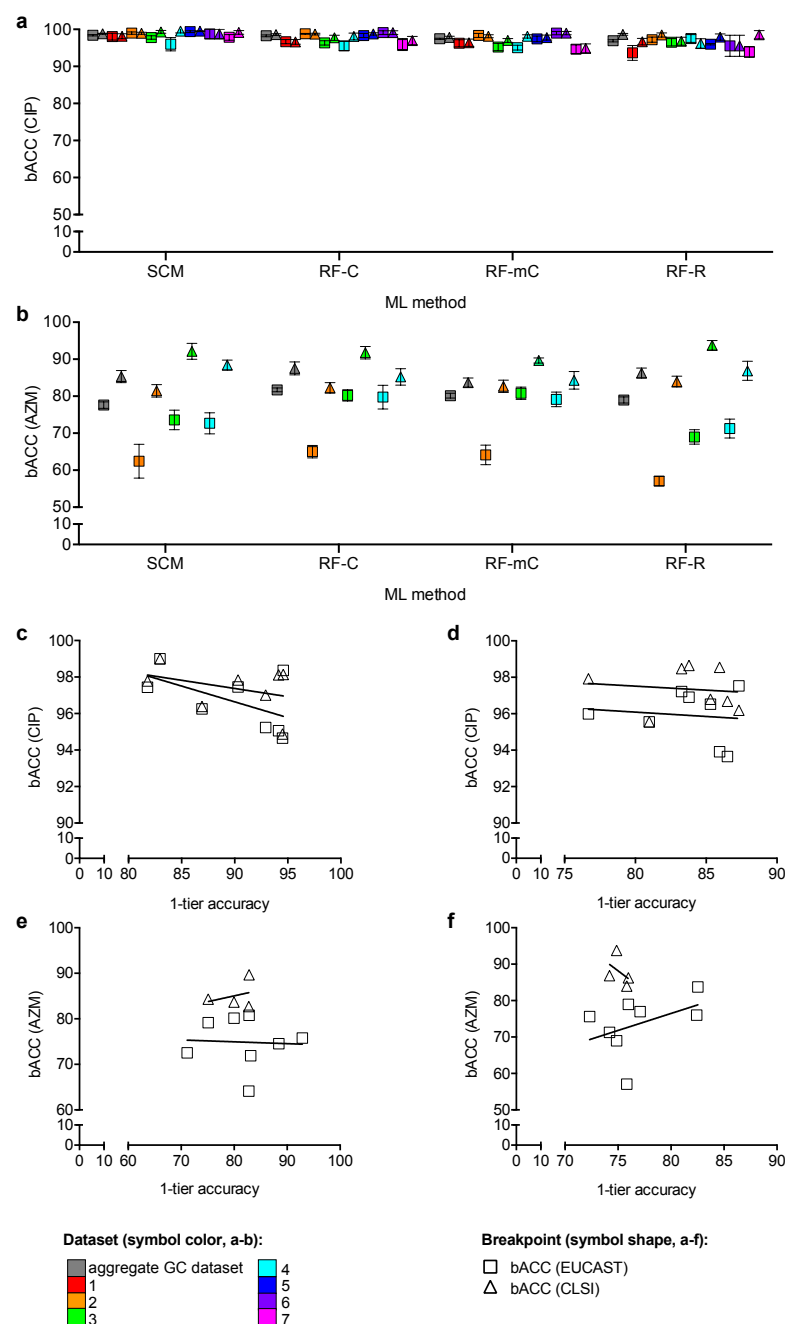

**Figure 3. Differential performance of machine learning-based prediction models based on different resistance metrics in gonococci.** Mean balanced accuracy (bACC) with 95% confidence intervals of predictive models for **(a)** ciprofloxacin non-susceptibility (CIP NS) across all datasets and **(b)** azithromycin (AZM) NS for all datasets for which both NS breakpoints were evaluated. Scatter plots comparing the mean 1-tier accuracy

741 to the mean bACC for each gonococcal dataset derived from **(c-d)** CIP and **(e-f)** AZM  
 742 MIC prediction models by **(c,e)** random forest multi-class classification and **d,f** random  
 743 forest regression. Symbol colors in **(a-b)** indicate the datasets from which the training and  
 744 testing sets were derived. Symbol shapes in **(a-f)** indicate the NS breakpoint. The line of  
 745 best fit for each of the breakpoints is indicated in **(c-f)**. SCM, set covering machine; RF-  
 746 C, random forest binary classification; RF-mC, random forest multi-class classification;  
 747 RF-R, random forest regression.

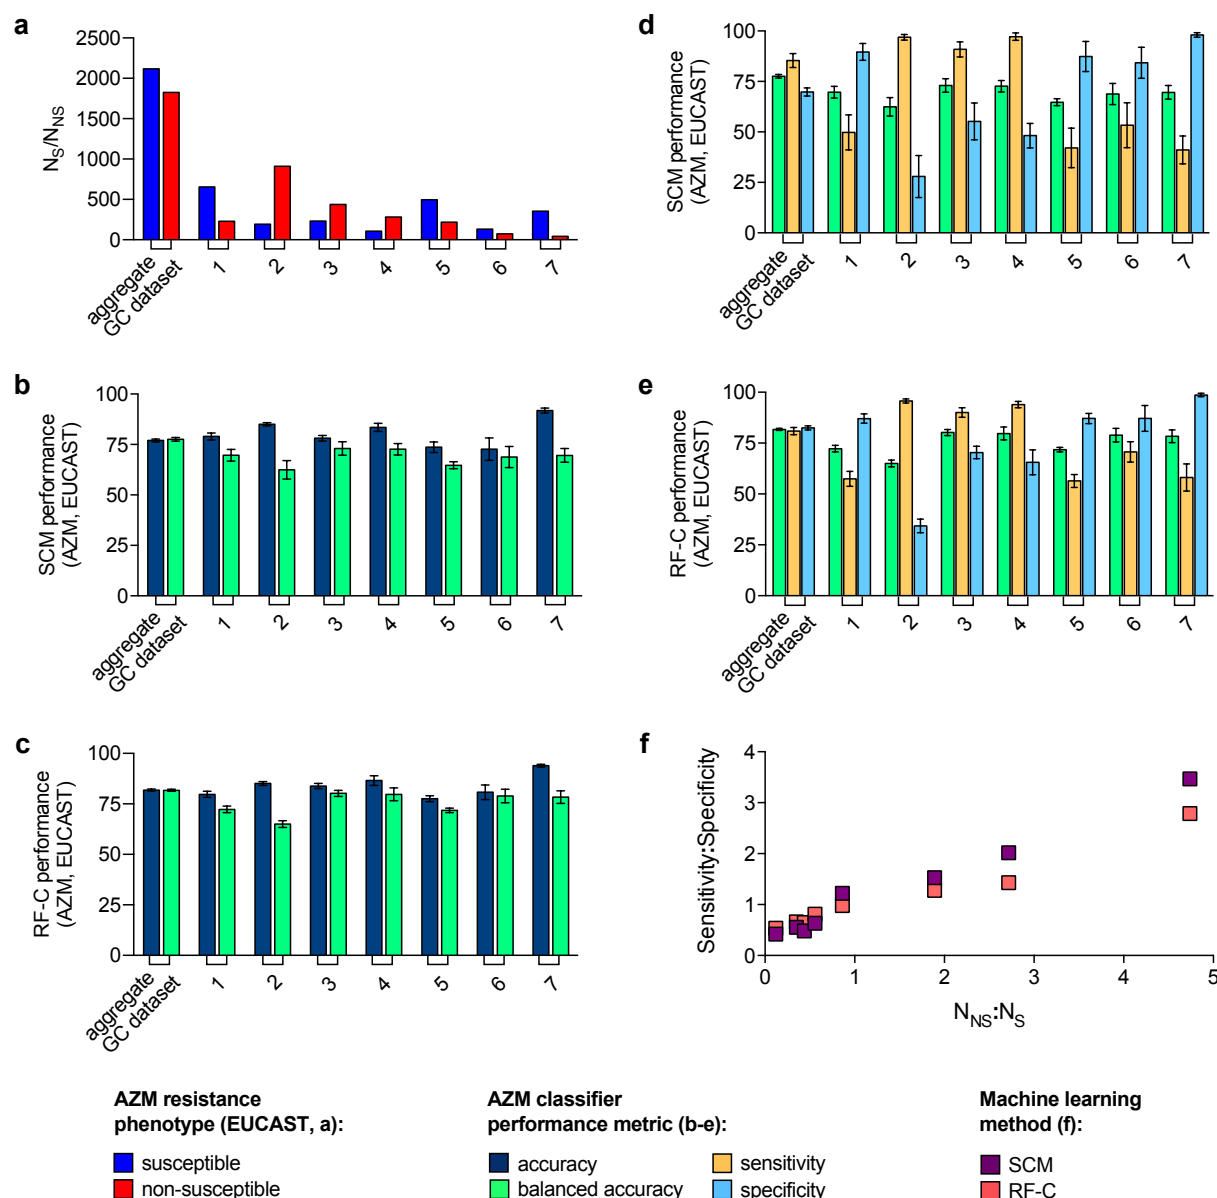

**Figure 4. Differential performance of predictive models of resistance across**

**different performance metrics. (a) Distribution of azithromycin (AZM) susceptible (S)**

**and non-susceptible (NS) strains by the EUCAST breakpoint in each gonococcal dataset.**

**Mean accuracy and balanced accuracy (bACC) with 95% confidence intervals achieved**

**by (b) set covering machine (SCM) and (c) random forest classification (RF-C) models**

**for AZM NS by the EUCAST breakpoint across gonococcal datasets. Mean bACC,**

**sensitivity, and specificity with 95% confidence intervals achieved by (d) SCM and (e) RF-**

756 C models for AZM NS by the EUCAST breakpoint across gonococcal datasets. **(f)** Scatter  
 757 plot showing the relationship between the ratio of NS strains to S strains in each dataset  
 758 and the ratio of sensitivity to specificity achieved by SCM and RF-C methods.  
 759



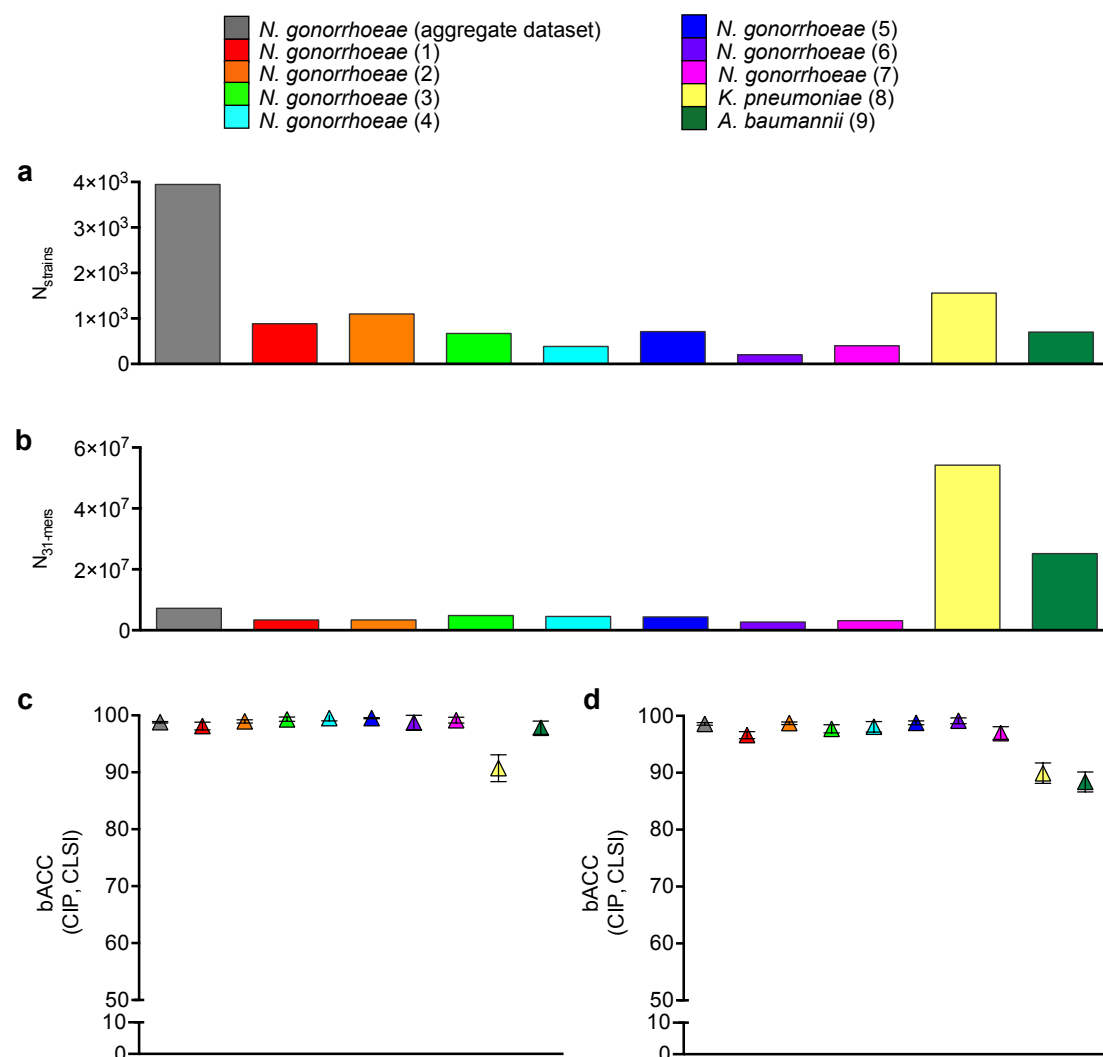

**Figure 5. *K. pneumoniae* and *A. baumannii* datasets are associated with higher genetic diversity and lower performance of resistance prediction models.** Number of **a)** strains and **b)** unique 31-mers in each dataset. Mean balanced accuracy (bACC) with 95% confidence intervals achieved by **c)** set covering machine and **d)** random forest classification models for ciprofloxacin (CIP) NS by the CLSI breakpoints across gonococci, *K. pneumoniae*, and *A. baumannii* datasets.
