1 **Evaluation of parameters affecting performance and reliability of machine learning-**  
2 **based antibiotic susceptibility testing from whole genome sequencing data**

3

4 Allison L. Hicks<sup>1,\*</sup>, Nicole Wheeler<sup>2</sup>, Leonor Sánchez-Busó<sup>2,3</sup>, Jennifer L. Rakeman<sup>4</sup>,  
5 Simon R. Harris<sup>5</sup>, Yonatan H. Grad<sup>1,6,\*</sup>

6

7 1 Department of Immunology and Infectious Diseases, Harvard T. H. Chan School of  
8 Public Health, Boston, Massachusetts 02115

9 2 Centre for Genomic Pathogen Surveillance, Wellcome Sanger Institute, Wellcome  
10 Genome Campus, Hinxton, Cambridgeshire, UK

11 3 Big Data Institute, Nuffield Department of Medicine, University of Oxford, Oxford, UK

12 4 Public Health Laboratory, Division of Disease Control, New York City Department of  
13 Health and Mental Hygiene, New York City, New York 10016

14 5 Microbiotica Ltd, Biodata Innovation Centre, Wellcome Genome Campus, Hinxton,  
15 Cambridgeshire, UK

16 6 Division of Infectious Diseases, Department of Medicine, Brigham and Women's  
17 Hospital, Harvard Medical School, Boston, Massachusetts 02115

18

19 \* Corresponding authors: [allison\\_hicks@g.harvard.edu](mailto:allison_hicks@g.harvard.edu), [ygrad@hsph.harvard.edu](mailto:ygrad@hsph.harvard.edu)

20 **Abstract:**

21 Prediction of antibiotic resistance phenotypes from whole genome sequencing data by  
22 machine learning methods has been proposed as a promising platform for the  
23 development of sequence-based diagnostics. However, there has been no systematic  
24 evaluation of factors that may influence performance of such models, how they might  
25 apply to and vary across clinical populations, and what the implications might be in the  
26 clinical setting. Here, we performed a meta-analysis of seven large *Neisseria*  
27 *gonorrhoeae* datasets, as well as *Klebsiella pneumoniae* and *Acinetobacter baumannii*  
28 datasets, with whole genome sequence data and antibiotic susceptibility phenotypes  
29 using set covering machine classification, random forest classification, and random forest  
30 regression models to predict resistance phenotypes from genotype. We demonstrate how  
31 model performance varies by drug, dataset, resistance metric, and species, reflecting the  
32 complexities of generating clinically relevant conclusions from machine learning-derived  
33 models. Our findings underscore the importance of incorporating relevant biological and  
34 epidemiological knowledge into model design and assessment and suggest that doing so  
35 can inform tailored modeling for individual drugs, pathogens, and clinical populations. We  
36 further suggest that continued comprehensive sampling and incorporation of up-to-date  
37 whole genome sequence data, resistance phenotypes, and treatment outcome data into  
38 model training will be crucial to the clinical utility and sustainability of machine learning-  
39 based molecular diagnostics.

40

41 **Author Summary:**

42 Machine learning-based prediction of antibiotic resistance from bacterial genome  
43 sequences represents a promising tool to rapidly determine the antibiotic susceptibility  
44 profile of clinical isolates and reduce the morbidity and mortality resulting from  
45 inappropriate and ineffective treatment. However, while there has been much focus on  
46 demonstrating the diagnostic potential of these modeling approaches, there has been  
47 little assessment of potential caveats and prerequisites associated with implementing  
48 predictive models of drug resistance in the clinical setting. Our results highlight significant  
49 biological and technical challenges facing the application of machine learning-based  
50 prediction of antibiotic resistance as a diagnostic tool. By outlining specific factors  
51 affecting model performance, our findings provide a framework for future work on  
52 modeling drug resistance and underscore the necessity of continued comprehensive  
53 sampling and reporting of treatment outcome data for building reliable and sustainable  
54 diagnostics.

55

56

57

58

59 **Introduction:**

60 At least 700,000 deaths annually can be attributed to antimicrobial resistant (AMR)  
61 infections, and, without intervention, the annual AMR-associated mortality is estimated to  
62 climb to 10 million in the next 35 years (1). As most patients are still treated based on  
63 empirical diagnosis rather than confirmation of the causal agent or its drug susceptibility  
64 profile, development of improved, rapid diagnostics enabling tailored therapy represents  
65 a clear actionable intervention (1). The Cepheid GeneXpert MTB/RIF assay, for example,  
66 has been widely adopted for rapid point-of-care detection of *Mycobacterium tuberculosis*  
67 (TB) and rifampicin (RIF) resistance (2), and the SpeeDx ResistancePlus GC assay used  
68 to detect both *Neisseria gonorrhoeae* and ciprofloxacin (CIP) susceptibility was recently  
69 approved for marketing as an *in vitro* diagnostic in Europe.

70 Molecular assays offer improved speed compared to gold-standard phenotypic  
71 tests and are of particular interest because of their promise of high accuracy for the  
72 prediction of AMR phenotype based on genotype (2, 3). Approaches for predicting  
73 resistance phenotypes from genetic features include direct association (*i.e.*, using the  
74 presence or absence of genetic variants known to be associated with resistance to infer  
75 a resistance phenotype) and the application of predictive models derived from machine  
76 learning (ML) algorithms. Direct association approaches can offer simple, inexpensive,  
77 and often highly accurate resistance assays for some drugs/species (2) and may even  
78 provide more reliable predictions of resistance phenotype than phenotypic testing (4-6).  
79 However, these approaches are limited by the availability of well-curated and up-to-date  
80 panels of resistance variants, as well as the diversity and complexity of resistance  
81 mechanisms. ML strategies can facilitate modeling of more complex, diverse, and/or

82 under-characterized resistance mechanisms, thus outperforming direct association for  
83 many drugs/species (7-9). With the increasing speed and decreasing cost of sequencing  
84 and computation, ML approaches can be applied to genome-wide feature sets (8, 10-18),  
85 ideally obviating the need for comprehensive *a priori* knowledge of resistance loci.

86 While prediction of antibiotic resistance phenotypes from ML-derived models  
87 based on genomic features has become increasingly prominent as a promising diagnostic  
88 tool (8, 11-15, 17), there has been no systematic evaluation of factors that may influence  
89 performance of such models and their implications in the clinical setting. The extent to  
90 which ML model accuracy varies by antibiotic is unclear, as is the impact of sampling bias  
91 on model performance. It is further unclear what the most relevant resistance metric (*i.e.*,  
92 minimum inhibitory concentration [MIC] or categorical report of susceptibility) for such a  
93 diagnostic might be and how amenable different species might be to genotype-to-  
94 phenotype modeling of antibiotic resistance.

95 We used set covering machine (SCM) (19) and random forest (RF) (20)  
96 classification as well as RF regression algorithms to build and test predictive models with  
97 seven gonococcal datasets for which whole genome sequences (WGS) and ciprofloxacin  
98 (CIP) and azithromycin (AZM) MICs were available. AZM is currently part of the  
99 recommended treatment regimen for gonococcal infections, and with the development of  
100 resistance diagnostics, CIP may represent a viable treatment option (21-23). While the  
101 majority of CIP resistance in gonococci can be attributed to *gyrA* mutations, AZM  
102 resistance is associated with more diverse and complex resistance mechanisms (23, 24),  
103 offering an opportunity to evaluate ML methods across drugs with distinct pathways to  
104 resistance. The range of datasets and sampling frames enables assessment of sampling

105 bias on model reliability. Further, the availability of MICs, as well as distinct European  
106 Committee on Antibiotic Susceptibility Testing (EUCAST) and Clinical and Laboratory  
107 Standards Institute (CLSI) breakpoints, for these drugs allows for evaluation of predictive  
108 models based on different resistance metrics. Finally, extension of these analyses to  
109 *Klebsiella pneumoniae* and *Acinetobacter baumannii* datasets for which WGS and CIP  
110 MICs were available allows for assessment of model performance for the same drug in  
111 species with open pangenomes (25, 26), which may be more difficult to model given the  
112 increased genomic diversity and potential resistance mechanism diversity and complexity  
113 (47).

114 Our results demonstrate that using ML to predict antibiotic resistance phenotypes  
115 from WGS data yields variable results across drugs, datasets, resistance metrics, and  
116 species. While more comprehensive assessment of different methods will be required to  
117 build the most accurate and reliable models, we suggest that tailored modeling for  
118 individual drugs, species, and clinical populations may be necessary to successfully  
119 leverage these ML-based approaches as diagnostic tools. We further suggest that  
120 continuing surveillance, isolate collection, and reporting of WGS, MIC phenotypes, and  
121 treatment outcomes will be crucial to the sustainability of any such molecular diagnostics.

122

## 123 **Results:**

### 124 **Accuracy of ML-based prediction of resistance phenotypes varies by antibiotic.**

125 Given the distinct MIC distributions and distinct pathways to resistance for CIP and AZM  
126 in gonococci, these two drugs enable evaluation of drug-specific performance of ML-  
127 based resistance prediction models. CIP MICs in surveys of clinical gonococcal isolates

128 are bimodally distributed, with the majority of isolates having MICs well above or below  
129 the non-susceptibility (NS) breakpoints, while the majority of reported AZM MICs in  
130 gonococci are closer to the NS breakpoints (<https://mic.eucast.org/Eucast2>). These  
131 trends were recapitulated in the gonococcal isolates assessed here (**Fig 1a-b**). Further,  
132 the vast majority of CIP resistance in gonococci observed to date is explained by  
133 mutations in *gyrA* and *parC* and has spread predominantly through clonal expansion,  
134 generally resulting in MICs  $\geq 1 \mu\text{g/mL}$  (23, 27). In contrast, AZM resistance in gonococci  
135 has arisen many times *de novo* through multiple pathways, many of which remain under-  
136 characterized and are associated with lower-level resistance (23, 27, 28). As expected,  
137 the GyrA S91F mutation alone predicts NS to CIP by both EUCAST and CLSI breakpoints  
138 in the aggregate gonococcal dataset assessed here with  $\geq 98\%$  sensitivity and  $\geq 99\%$   
139 specificity (**Table S1**). AZM NS showed lower values for these metrics, indicating it was  
140 not as well explained by known resistance variants, with extensive contributions from  
141 uncharacterized mechanisms and/or multifactorial interactions (**Table S2**).

142 We next trained and evaluated ML-based predictive models for CIP and AZM  
143 resistance in gonococci (**Table S3**). By all ML methods and breakpoints, CIP NS was  
144 predicted with significantly higher balanced accuracy (bACC) than AZM NS in the  
145 aggregate gonococcal dataset ( $P < 0.0001$ , **Fig 1c-d**, **Tables S4-S5**): CIP NS was  
146 predicted with mean bACC  $\geq 93\%$  across all methods, breakpoints, and datasets, whereas  
147 mean bACC for AZM NS classification ranged from 57% to 94% (**Tables S4-S5**).  
148 Variation in model performance across antibiotics has been attributed to different  
149 proportions of susceptible (S) and NS isolates (7, 14, 15); however, by the EUCAST  
150 breakpoints, the aggregate gonococcal dataset as well as some of the individual datasets

151 had nearly identical proportions of CIP and AZM susceptible and non-susceptible isolates,  
152 demonstrating that variable representation of S and NS isolates alone cannot explain  
153 reduced performance of AZM models compared to CIP.

154 We tested whether the poorer performance for AZM may be attributable to the  
155 large fraction of isolates with MICs around the breakpoint. Removing strains with AZM  
156 MICs that were  $\leq 2$  doubling dilutions of the NS breakpoints from the aggregate  
157 gonococcal dataset (**Table S6**) yielded AZM MIC distributions similar to those of CIP (**Fig**  
158 **S1a-b**). Analysis of this restricted dataset resulted in higher performance of SCM and RF  
159 AZM NS classifiers compared to those trained and tested on the full aggregate  
160 gonococcal dataset (**Fig S1c**). However, bACC of AZM classifiers trained and tested on  
161 the restricted datasets was still significantly lower than bACC of the CIP NS classifiers ( $P$   
162  $< 0.0001$  and  $P < 0.003$  for classifiers based on the EUCAST and CLSI breakpoints,  
163 respectively), suggesting that both MIC distribution and additional drug-specific factors  
164 can influence performance of resistance classifiers.

165

#### 166 **Sampling bias in training and testing data skews resistance model performance.**

167 The diversity of resistance mechanisms for AZM in gonococci offers an opportunity to  
168 evaluate the effects of sampling bias on model performance. The sampling frames for the  
169 seven gonococcal datasets ranged geographically from citywide to international and  
170 temporally from a single year to  $>20$  years, and several datasets were enriched for AZM  
171 resistance (11, 29) (**Table 1**). The distributions of both AZM MICs and known resistance  
172 mechanisms across datasets (**Fig 1b, Table S2**) and the variable performance of AZM  
173 resistance models across datasets (**Table S5**) suggest that AZM resistance mechanisms



174 are differentially distributed across the sampled clinical populations. Further, the higher  
175 performance of many SCM and RF-based AZM classifiers on training data compared to  
176 test sets (**Table S5**) suggests that potentially due to a lack of signal, AZM models are  
177 incorporating substantial noise or confounding factors, which may be population-specific.  
178 To assess the impact of sampling on model reliability, the performance of RF classifiers  
179 in prediction of AZM NS phenotypes were compared across multiple training and testing  
180 sets. These include classifiers trained on subsamples of isolates from a single dataset,  
181 classifiers trained on the aggregate gonococcal dataset, and classifiers trained on the  
182 aggregate gonococcal dataset excluding isolates from the same dataset as the testing  
183 set (**Table S6**). Given the low representation of AZM NS strains by the CLSI breakpoint  
184 in many datasets, these analyses were only performed using the EUCAST breakpoint.

185         While it may be assumed that increased availability of paired genomic and  
186 phenotypic resistance data from a broader range of clinical populations will facilitate more  
187 accurate and reliable modeling (30), our results demonstrate that in predicting AZM  
188 resistance phenotypes for isolates from most datasets (with the exception of datasets 2  
189 and 5), performance of classifiers trained on the aggregate dataset was not significantly  
190 better than performance of classifiers trained only on isolates from the dataset from which  
191 the test isolates were derived ( $P < 0.0001$  and  $P = 0.002$  for datasets 2 and 5,  
192 respectively,  $P = 0.008$  for dataset 3, where the classifiers trained on the aggregate  
193 dataset had lower bACC than classifiers trained only on isolates from dataset 3, and  $P >$   
194  $0.234$  for all other datasets, **Fig 2a**). Further, there was substantial variation in  
195 performance of models trained on the aggregate dataset across testing sets, with models  
196 achieving significantly higher bACC for strains from datasets 3 and 4 than for strains from

197 dataset 2 ( $P < 0.0009$ , **Fig 2a**), perhaps reflecting enrichment for AZM NS in these former  
198 datasets (**Table 1**). Additionally, with the exception of dataset 5, performance of AZM  
199 resistance classifiers trained only on isolates from the dataset from which the test isolates  
200 were derived was significantly higher than performance of classifiers trained on the  
201 aggregate dataset excluding isolates from the test dataset ( $P = 0.537$  for dataset 5,  $P <$   
202  $0.0005$  for all other datasets, **Fig 2a**).

203 Performance of RF classifiers trained and tested on dataset 2 was limited by low  
204 specificity, which was improved in models trained on the aggregate dataset (**Fig 2b**). The  
205 low specificity achieved by RF classifiers trained and tested on this dataset is likely due  
206 to the low representation of S strains, most of which were within one doubling dilution of  
207 the NS breakpoint (**Fig 2c**), and thus the more comprehensive representation of negative  
208 (S) data in the aggregate training set was associated with improved specificity.  
209 Conversely, performance of RF classifiers trained and tested on dataset 5 was more  
210 limited by low sensitivity, which was improved in models trained on the aggregate dataset  
211 (**Fig 2b**). This dataset had a low representation of strains with high AZM MICs (**Fig 2d**),  
212 and thus the more comprehensive representation of positive (NS) data in the aggregate  
213 training set was associated with improved sensitivity in predicting AZM NS for these  
214 strains. For both SCM and RF-C AZM resistance models across all datasets, there was  
215 a significant positive correlation between the ratio of model sensitivity to model specificity  
216 and the ratio of NS to S strains in the dataset (Pearson  $r > 0.98$ ,  $P < 0.0001$  [Pearson  
217 correlation] for both SCM and RF-C, **Fig S2a**).

218 On the other hand, while representation of strains with higher AZM MICs was also  
219 observed in other datasets (*i.e.*, datasets 1, 6, and 7) and was similarly reflected in the

220 sensitivity-limited performance of RF classifiers trained and tested on these datasets  
221 (**Table S5**), AZM NS prediction accuracy for strains from these datasets was not improved  
222 by training classifiers on the aggregate dataset. Further, even after down-sampling two  
223 of the datasets with the most disparate MIC distributions, sample sizes, and model  
224 performance (datasets 2 and 4) such that the number of strains and AZM MIC  
225 distributions were identical between the two datasets (**Fig S2b**), there was still a  
226 significant difference in AZM NS prediction accuracy of models trained and tested on  
227 these different datasets (**Fig S2c**,  $P < 0.004$ ). Together, these results demonstrate that  
228 resistance model performance may be strongly associated with the distributions of both  
229 resistance phenotypes and genetic features and thus can be highly population-specific.

230

### 231 **ML prediction models of antibiotic susceptibility / non-susceptibility outperform** 232 **MIC models**

233 Gonococcal CIP and AZM MICs were dichotomized by both EUCAST and CLSI  
234 breakpoints to assess the impact of variation in MIC breakpoints on model performance.  
235 As the EUCAST and CLSI breakpoints for CIP in gonococci are within a single doubling  
236 dilution and the vast majority of isolates have much lower or higher CIP MICs (**Fig 1a**),  
237 >99% of isolates in the aggregate dataset were consistently S or NS by both breakpoints.  
238 Of the 23 isolates with MICs between the two breakpoints, 18 had MICs derived from  
239 Etests of 0.032  $\mu\text{g/mL}$  or 0.047  $\mu\text{g/mL}$ , making their classification relative to the EUCAST  
240 breakpoint of 0.03  $\mu\text{g/mL}$  ambiguous. In contrast, the EUCAST and CLSI breakpoints for  
241 AZM in gonococci are separated by two doubling dilutions, and for many isolates, the  
242 AZM MIC was within this range (**Fig 1b**). As such, only 67% of isolates in the aggregate

243 dataset were consistently S or NS by both breakpoints. CIP NS classifier performance  
244 was either identical or nearly identical for both breakpoints in the aggregate and most  
245 individual gonococcal datasets (**Fig 3a**). In contrast, the bACC of AZM NS prediction by  
246 both SCM and RF classifiers based on the CLSI breakpoint was significantly higher than  
247 for those based on the EUCAST breakpoint across all gonococcal datasets assessed by  
248 both breakpoints ( $P < 0.0001$ , **Fig 3b**).

249 To assess the performance of MIC prediction models relative to binary S/NS  
250 resistance phenotype classifiers, RF-mC and RF-R models were trained and evaluated  
251 for CIP and AZM MIC prediction in gonococci. Average exact match rates between  
252 predicted and phenotypic MICs ranged from 64-86% and 54-78% by RF-mC and RF-R,  
253 respectively, for CIP, and from 24-60% and 45-65%, respectively, for AZM (**Tables S4-**  
254 **S5**). Average 1-tier accuracies (the percentage of isolates with predicted MICs within one  
255 doubling dilution of phenotypic MICs) were substantially higher but also varied widely  
256 across datasets and between the two MIC prediction methods (ranging from 82%-96%  
257 and 76-87% by RF-mC and RF-R, respectively, for CIP, and from 73-94% and 73-83%,  
258 respectively, for AZM; **Tables S4-S5**). There was no consistent or significant relationship  
259 across the different datasets between MIC prediction accuracy (exact match or 1-tier  
260 accuracy) and bACC for either drug by either MIC prediction method (**Fig 3c-f**). Further,  
261 for both drugs by both breakpoints in the aggregate gonococcal dataset, binary RF-C  
262 models had equivalent or significantly higher bACC than RF-mC and RF-R MIC prediction  
263 models ( $P > 0.175$  for AZM NS by the CLSI breakpoint by RF-C compared to RF-mC or  
264 RF-R,  $P < 0.017$  for all others, **Tables S4-S5**).

265

266 **Species with high genomic diversity pose challenges to ML-based antibiotic**  
267 **resistance prediction**

268 Increasing genomic diversity, or an increasing ratio of genomic features (*e.g.*, *k*-mers) to  
269 observations (*e.g.*, genomes), may present an additional challenge for ML-based  
270 prediction of antibiotic resistance (12). To investigate ML-based antibiotic resistance  
271 prediction across species with different levels of genomic diversity, SCM and RF-C were  
272 used to model CIP NS in *K. pneumoniae* and *A. baumannii*, two species with genomic  
273 diversity (*i.e.*, ratio of unique 31-mers to number of genomes) several times that of  
274 gonococci (**Fig 4a-b**). SCM classifiers trained on and used to predict CIP NS for *K.*  
275 *pneumoniae* achieved significantly lower accuracy than all of the gonococcal datasets ( $P$   
276  $< 0.0001$ , **Fig 4c**), while SCM classifiers trained on and used to predict CIP NS for *A.*  
277 *baumannii* achieved significantly lower accuracy than gonococcal datasets 3-5 and 7 ( $P$   
278  $< 0.033$ ) and roughly equivalent accuracy to gonococcal datasets 1-2 and 6, as well as  
279 the aggregate gonococcal dataset ( $P > 0.059$ , **Fig 4c**). The performance of RF-C models  
280 was significantly lower for both *K. pneumoniae* and *A. baumannii* compared to all  
281 gonococcal datasets ( $P < 0.0001$ , **Fig 4d**).

282 While the SCM classifiers for CIP NS in *K. pneumoniae* performed significantly  
283 better on the training sets than the testing sets (**Table S4**,  $P < 0.0001$ ), indicating that  
284 these models may be overfitted, there was no significant difference between RF-C model  
285 performance on training and testing sets for either *K. pneumoniae* or *A. baumannii* ( $P >$   
286  $0.194$ ), suggesting that overfitting alone cannot explain the variable classifier  
287 performance across different species. Down-sampling *K. pneumoniae* and *A. baumannii*  
288 to match the CIP MIC distributions of the gonococcal datasets was infeasible due to the

289 narrow range of MICs tested for the former two species (**Table S7**). However, even after  
290 down-sampling to equalize the number of S and NS strains within each dataset (**Table**  
291 **S6, Fig. S3a-b**), performance of *K. pneumoniae* and *A. baumannii* CIP NS classifiers was  
292 still significantly lower than that of gonococcal CIP NS classifiers, with the exception of  
293 SCM classifiers based on the down-sampled *K. pneumoniae* dataset, which performed  
294 roughly equivalently to SCM classifiers based on gonococcal datasets 2 and 6 ( $P > 0.07$   
295 for the SCM classifiers based on the down-sampled *K. pneumoniae* dataset compared to  
296 SCM classifiers based on gonococcal datasets 2 and 6;  $P < 0.0004$  for all other  
297 comparisons, **Figure S3c**).

298 Direct association based on GyrA codon 83 mutations (equivalent to codon 91 in  
299 gonococci) alone predicted CIP NS in *K. pneumoniae* with 86% sensitivity and 99%  
300 specificity, and thus had a marginally higher bACC (92.5%) than for the SCM classifiers  
301 and a substantially higher bACC than the RF classifiers. Similarly, for *A. baumannii*, GyrA  
302 codon 81 mutations (equivalent to codon 91 in gonococci) alone predicted CIP NS in with  
303 97% sensitivity and 98% specificity, and thus with a roughly equivalent bACC (97.5%) to  
304 the SCM classifiers and a substantially higher bACC than the RF classifiers.

305

306

## 307 **Discussion**

308 ML offers an opportunity to leverage WGS data to aid in development of rapid molecular  
309 diagnostics. While more comprehensive sampling of methods and parameters will be  
310 necessary to optimize model performance, we demonstrate that multiple factors beyond  
311 ML methods and parameters can affect model performance, reliability, and

312 interpretability. Our results affirmed that drugs associated with complex and/or diverse  
313 resistance mechanisms present challenges to ML-based prediction of resistance  
314 phenotypes and that sampling frame (*i.e.*, temporal range, geographic range, and/or  
315 sampling approach) can substantially affect performance of such predictive models. We  
316 demonstrated significant variability in performance and potential clinical utility of  
317 predictive models based on different resistance metrics and further showed that the  
318 capacity to model antibiotic resistance may be highly variable across different species.

319

### 320 **Variable performance of ML-based resistance prediction models by antibiotic**

321         Genotype-based resistance diagnostics have largely focused more on evaluating  
322 the presence of resistance determinants and less on predicting the susceptibility profile  
323 of a given isolate (8). However, in clinical settings where the empirical presumption is of  
324 resistance, prediction that an isolate is susceptible to an antibiotic may be more important  
325 in guiding treatment decisions. As such, the clinical utility of a genotype-based resistance  
326 diagnostic may be determined by its capacity to accurately predict susceptibility  
327 phenotype for multiple drugs.

328         While variable performance of ML-based predictive models has been observed  
329 across different drugs (7, 8, 10, 11, 14, 15), it has often been attributed to dataset size  
330 and/or imbalance (7, 14, 15). Further, while it is more difficult to predict resistance  
331 phenotypes from genotypes for drugs that are associated with unknown, multifactorial,  
332 and/or diverse resistance mechanisms than for drugs for which resistance can largely be  
333 attributed to a single variant (14, 29), this caveat has been presented specifically as a  
334 limitation of models based on known resistance loci in comparison to unbiased machine

335 learning-based MIC prediction using genome-wide feature sets (14). However, by  
336 comparing performance of predictive models based on genome-wide feature sets  
337 between CIP and AZM across multiple gonococcal datasets, we showed that even with  
338 relatively large and phenotypically balanced datasets, ML algorithms cannot necessarily  
339 be expected to successfully model complex and/or diverse resistance mechanisms,  
340 particularly given that the representation of these resistance mechanisms in training  
341 datasets is *a priori* unknown.

342         As a high proportion of reported AZM MICs in gonococci are within 1-2 doubling  
343 dilutions of the NS breakpoints, it is possible that the inferior performance of AZM  
344 classifiers is partly attributable to errors and/or variations in MIC testing. However, given  
345 the noise of phenotypic MIC testing even with standardized protocols (32), this may be  
346 an inherent limitation of NS classifiers when low-level resistance is common. Further,  
347 while we show that removing strains with MICs  $\leq 2$  doubling dilutions from the breakpoints  
348 improved AZM classifier performance compared to AZM models trained and tested on  
349 the full dataset, performance of AZM classifiers trained and tested on this restricted  
350 dataset was still significantly lower than that of CIP classifiers, suggesting that additional  
351 drug-specific factors, such resistance mechanism diversity and/or complexity, can  
352 constrain classifier performance.

353

### 354 **Impact of demographic, geographic, and timeframe sampling bias on ML model** 355 **predictions of antibiotic resistance**

356         Sampling bias presents a substantial challenge in any predictive modeling, and  
357 sampling from limited patient demographics or during limited time periods may have



358 considerable effects on the distributions of resistance phenotypes and resistance  
359 mechanisms (33, 34). For example, in TB, the RpoB I491F mutation that has been  
360 associated with failure of commercial RIF resistance diagnostic assays, including the  
361 GeneXpert MTB/RIF assay, reportedly accounted for <5% of TB RIF resistance in most  
362 countries, but, in Swaziland was found to be present in up to 30% of MDR-TB (35).  
363 Further, as the focus with statistical classifiers is building models from feature sets that  
364 can accurately predict an outcome, rather than understanding the association between  
365 each of the features and the outcome, potential confounding effects from factors such as  
366 population structure (36-38) or correlations among resistance profiles of different drugs  
367 (13) are rarely considered.

368 By comparing performance of AZM NS classifiers across multiple training and  
369 testing sets, we showed significant variation in performance of classifiers trained on a  
370 large and diverse global collection across testing sets from different sampling frames. In  
371 some cases of imbalanced datasets, models trained on datasets with a more  
372 comprehensive representation of resistance phenotypes improve prediction accuracy.  
373 Our results further demonstrate that the direction of dataset imbalance (*i.e.*, the ratio of  
374 NS to S strains) is significantly correlated with the direction of model performance (*i.e.*,  
375 the ratio of sensitivity to specificity), suggesting that, for example, optimizing sensitivity of  
376 predictive models for drugs with low prevalence of NS strains may require substantial  
377 enrichment of NS strains and/or down-sampling of S strains. However, while differential  
378 classifier performance among different datasets may be partially attributable to differential  
379 MIC distributions, our results also show variable classifier performance between datasets  
380 even in the case of identical MIC distributions (and sample size) and further suggest that

381 heavier sampling across more geographic regions cannot necessarily be expected to  
382 significantly improve model performance, as models trained on the aggregate global  
383 gonococcal dataset did not improve prediction accuracy for most datasets.

384 This, together with decreased performance when excluding isolates from the  
385 dataset from which the isolates being tested were derived, suggests that factors such as  
386 population-specific resistance mechanisms, genetic divergence at resistance loci, and/or  
387 confounding effects may constrain model reliability across populations, particularly in the  
388 case of drugs like AZM with complex and/or diverse resistance mechanisms, where a  
389 substantial portion of the model may be overfit, or based on confounding factors or noise,  
390 rather than biologically-meaningful resistance variants. Further, it should be noted that  
391 MIC testing methods varied between some datasets (and between strains within dataset  
392 5), and such variations may represent an additional confounding factor influencing  
393 classifier performance. Thus, both incorporation of methods to correct for potentially  
394 confounding factors, such as population structure, as have been introduced for genome-  
395 wide associate studies [15-17], and increased availability of paired WGS and antibiotic  
396 susceptibility data produced by consistent standardized protocols may improve reliability  
397 of machine learning-based prediction of antibiotic resistance across different populations.

398

399 **ML resistance prediction model performance varies by NS breakpoints and by**  
400 **categorical vs MIC-based resistance metrics**

401 While measurement of MICs is vital for surveillance and investigation of resistance  
402 mechanisms, resistance breakpoints that relate *in vitro* MIC measurements to expected  
403 treatment outcomes inform clinical decision-making. However, standard breakpoints for

404 NS to a given drug in a given species are often informed less by treatment outcome data,  
405 but rather factors such as pharmacokinetics and MIC distributions that can fail to account  
406 for a variety of intra-host conditions that could influence drug efficacy (39-42). Recent  
407 studies have shown that isolates that are classified as susceptible by standard  
408 breakpoints but have higher MICs are associated with a greater risk of treatment failure  
409 than isolates with lower MICs (43). Further, resistance breakpoints and testing protocols  
410 can vary across different organizations, and thus incongruence across phenotypic  
411 information included in the training data may introduce additional sources of error in  
412 predictive modeling. By comparing performance of predictive models of CIP and AZM NS  
413 based on EUCAST and CLSI breakpoints, we demonstrated breakpoint-specific  
414 performance of models. For CIP, such breakpoint-specific performance is likely largely  
415 attributable to variations in MIC testing protocols and thus ambiguous classification of  
416 some strains by the EUCAST breakpoint. On the other hand, the substantially lower  
417 performance of all AZM models based on the EUCAST breakpoint compared to those  
418 based on the CLSI breakpoint suggests that many isolates with AZM MICs between the  
419 two breakpoints lack genetic signatures that contribute to high model performance. While  
420 the clinical relevance of AZM MICs between these two breakpoints in gonococci is  
421 unclear, these isolates may be more likely to be associated with AZM treatment failure  
422 than isolates with lower MICs, and thus evaluation of classifiers using only higher  
423 breakpoints may misrepresent their diagnostic value, particularly in the absence of  
424 sufficient treatment outcome data.

425         Models that predict MICs provide more refined output than a binary classifier but  
426 generally achieve low rates of exact matches between phenotypic and predicted MICs

427 and even fairly variable 1-tier accuracies (14, 15, 29). Given the noise in phenotypic MIC  
428 testing (32) and the potential lack of discriminating genetic features between isolates with  
429 MICs separated by 1-2 doubling dilutions (14), MIC prediction models may be unlikely to  
430 provide much better resolution than binary S/NS classifiers. Even if MIC predictions could  
431 provide additional resolution, the most important criterion of such a diagnostic would likely  
432 still be its ability to correctly predict resistance phenotypes relative to a clinically relevant  
433 breakpoint. Thus, performance of MIC prediction models with respect to breakpoints may  
434 be the biggest determinant of their diagnostic utility. By building MIC prediction models  
435 for CIP and AZM in gonococci, we observed low rates of exact matches between  
436 phenotypic and predicted MICs and variable 1-tier accuracies, with no relationship  
437 between 1-tier accuracy and categorical agreement (*i.e.*, prediction accuracy relative to  
438 NS breakpoints). Further, binary classifiers performed equivalently or better than MIC  
439 prediction models.

440

#### 441 **ML antibiotic resistance prediction model success varies across species**

442 Bacterial species with high genomic diversity (*e.g.*, open pangenomes) present  
443 additional challenges to ML-based prediction of antibiotic resistance. Increased  
444 resistance mechanism complexity and greater inter-isolate variation in resistance  
445 mechanisms require more intensive sampling to capture a significant portion of the  
446 resistome (47). On the technical side, even for heavily sampled species, when using  
447 whole genome feature sets, the number of genetic features (*e.g.*, k-mers or SNPs) will  
448 always be much larger than the number of observations (isolates), increasing the risk of  
449 overfitting (a situation that arises with so-called ‘fat data’; (12)). This raises concern in

450 species with open pangenomes, as the ratio of genetic features to the number of genomes  
451 is larger and the number of unique genetic features per number of genomes does not  
452 plateau. By comparing classifier performance in predicting CIP NS across gonococci, *K.*  
453 *pneumoniae*, and *A. baumannii*, we show that classifiers generally did not perform as well  
454 for species with open genomes (*K. pneumoniae* or *A. baumannii*) as for gonococci.  
455 Further, while a single GyrA mutation could explain the majority of CIP NS across all  
456 species evaluated here, unlike in gonococci and *A. baumannii* where this mutation  
457 explained  $\geq 97\%$  of CIP NS, 14% of CIP NS in *K. pneumoniae* could not be explained by  
458 this mutation, suggesting increased CIP resistance mechanism diversity and/or  
459 complexity in this species. Increased sampling, different methods, and/or finer tuning of  
460 hyperparameters may yield increased prediction accuracy for drug resistance in species  
461 with open genomes. For example, Nguyen et al., 2018 reported a mean bACC of 98.5%  
462 (average VME and ME rates of 0.5% and 2.5%, respectively) using a decision tree-based  
463 extreme gradient boosting regression model to predict CIP MICs for the *K. pneumoniae*  
464 strains assessed here (14), and adjusting for confounding factors such as population  
465 structure or variation in MIC testing method may yield more consistent prediction  
466 accuracies across species. However, our results demonstrate clear variation in potential  
467 limitations of genotype-to-resistance-phenotype models across different species.

468

469         Given the biological and epidemiological disparities associated with resistance to  
470 different drugs in different clinical populations and bacterial species, and their evident  
471 impact on performance of predictive models, successful implementation of genotype-  
472 based resistance diagnostics will likely require sustained comprehensive sampling to

473 ensure representation of complex, diverse, and/or novel resistance mechanisms,  
474 customized modeling, and incorporation of feedback mechanisms based on treatment  
475 outcome data. Further evaluation of additional ML methods and datasets may reveal  
476 more quantitative requirements and limitations associated with the application of  
477 genotype-to-resistance-phenotype predictive modeling in the clinical setting.

478

## 479 **Materials and Methods:**

### 480 **Isolate selection and dataset preparation**

481 See **Table 1** for details of the datasets assessed and **Table S7** for per-strain information.  
482 All gonococcal datasets contained a minimum of 200 isolates with WGS (Illumina MiSeq,  
483 HiSeq, or NextSeq) and MICs available for both CIP and AZM (by agar dilution and/or  
484 Etest). Isolates lacking CIP and AZM MIC data were excluded. MIC testing methods  
485 varied within datasets, as reported (10-13, 17, 18, 29).

486 *K. pneumoniae* and *A. baumannii* datasets were selected based on the availability  
487 of isolates collected during a single survey that were tested for CIP susceptibility and  
488 whole genome sequenced using consistent platforms (in both cases, the BD-Phoenix  
489 system and either Illumina MiSeq or NextSeq).

490 MIC data were obtained from the associated publications, except in the cases of  
491 dataset 1 (NCBI Bioproject PRJEB10016; see **Table S7**) and dataset 9, which were  
492 obtained from the NCBI BioSample database (<https://www.ncbi.nlm.nih.gov/biosample>).  
493 Raw sequence data were downloaded from the NCBI Sequence Read Archive  
494 (<https://www.ncbi.nlm.nih.gov/sra>). Genomes were assembled using SPAdes (48) with  
495 default parameters, and assembly quality was assessed using QUAST (49). Contigs <200

496 bp in length and/or with <10x coverage were removed. Isolates with assembly N50s below  
497 two standard deviations of the dataset mean were removed.

498

#### 499 **Evaluation of known resistance variants**

500 Previously identified genetic loci associated with reduced susceptibility to CIP or AZM in  
501 gonococci are indicated in **Tables S1-S2**, respectively. The sequences of these loci were  
502 extracted from the gonococcus genome assemblies using BLAST (50) followed by  
503 MUSCLE alignment (51) to assess the presence or absence of known resistance variants.  
504 The presence or absence of quinolone resistance determining mutations in *gyrA* was  
505 similarly assessed in *K. pneumoniae* and *A. baumannii* assemblies. Presence or absence  
506 of gonococcal AZM resistance mutations in the multi-copy 23S rRNA gene was assessed  
507 using BWA-MEM(52) to map raw reads to a single 23S rRNA allele from the NCCP11945  
508 reference isolate (NGK\_rna23s4), the Picard toolkit  
509 (<http://broadinstitute.github.io/picard>) to identify duplicate reads, and Pilon (53) to  
510 determine the mapping quality-weighted percentage of each nucleotide at the sites of  
511 interest.

512

#### 513 **ML-based prediction of resistance phenotypes**

514 Predictive modeling was carried out using SCM and RF algorithms, implemented in the  
515 Kover (11, 12) and ranger (54) packages, respectively. K-mer profiles (abundance profiles  
516 of all unique words of length k in each genome) were generated from the assembled  
517 contigs using the DSK k-mer counting software (55) with k=31, a length commonly used  
518 in bacterial genomic analysis (11, 12, 36, 56). For each dataset, 31-mer profiles for all  
519 strains were combined using the combinekmers tool implemented in SEER (36),

520 removing 31-mers that were not present in more than one genome in the dataset. Final  
521 matrices used for model training and prediction were generated by converting the  
522 combined 31-mer counts for each dataset into presence/absence matrices. For each  
523 SCM binary classification analysis (using S/NS phenotypes based on the two different  
524 breakpoints for each drug), the best conjunctive and/or disjunctive model using a  
525 maximum of five rules was selected using five-fold cross-validation, testing the suggested  
526 broad range of values for the trade-off hyperparameter of 0.1, 0.178, 0.316, 0.562, 1.0,  
527 1.778, 3.162, 5.623, 10.0, and 999999.0 to determine the optimal rule scoring function  
528 ([http://aldro61.github.io/kover/doc\\_learning.html](http://aldro61.github.io/kover/doc_learning.html)). In order to assess binary classification  
529 across multiple methods, RF was also used to build binary classifiers (RF-C) using S/NS  
530 phenotypes. Further, to compare performance of binary classifiers to MIC prediction  
531 models, RF was used to build multi-class classification (RF-mC) and regression (RF-R)  
532 models based on  $\log_2(\text{MIC})$  data. For all RF analyses, forests were grown to 1000 trees  
533 using node impurity to assess variable importance and five-fold cross-validation to  
534 determine the most appropriate hyperparameters (yielding the highest bACC or 1-tier  
535 accuracy for NS- or MIC-based models, respectively), testing maximum tree depths of 5,  
536 10, 100, and unlimited and mtry (number of features to split at each node) values of 1000,  
537 10000, and either  $\sqrt{p}$  or  $p/3$ , for classification and regression models, respectively, where  
538  $p$  is the total number of features (31-mers) in the dataset. While a grid search would  
539 enable assessment of more combinations of different hyperparameter values and thus  
540 finer tuning of hyperparameters, such an approach is computationally prohibitive on  
541 datasets of this size. To standardize reported MIC ranges across datasets, CIP MICs  
542  $\leq 0.008 \mu\text{g/mL}$  or  $\geq 32 \mu\text{g/mL}$  were coded as  $0.008 \mu\text{g/mL}$  or  $32 \mu\text{g/mL}$ , respectively, and



543 AZM MICs  $\leq 0.008$   $\mu\text{g/mL}$  or  $\geq 32$   $\mu\text{g/mL}$  were coded as 0.03  $\mu\text{g/mL}$  or 32  $\mu\text{g/mL}$ ,  
544 respectively.

545 The set of SCM and RF analyses performed are indicated in **Tables S3** and **S6**.  
546 For each of the seven individual gonococcal datasets, as well as the aggregate  
547 gonococcal dataset (all gonococcal datasets combined, removing duplicate strains) and  
548 the *K. pneumoniae* and *A. baumannii* datasets, training sets consisted of random sub-  
549 samples of two-thirds of isolates from the dataset indicated (maintaining proportions of  
550 each resistance phenotype from the original dataset), while the remaining isolates were  
551 used to test performance of the model. Each set of analyses (for each combination of  
552 dataset/drug/resistance metric/ML algorithm) was performed on 10 replicates, each with  
553 a unique randomly partitioned training and testing set. For all gonococcal datasets,  
554 separate models were trained and tested using the EUCAST (57) and CLSI (58)  
555 breakpoints for NS to CIP. Four of the *N. gonorrhoeae* datasets had insufficient (<15) NS  
556 isolates by the CLSI breakpoint for AZM non-susceptibility and thus were only assessed  
557 at the EUCAST AZM breakpoint. CIP MICs for the *K. pneumoniae* isolates were not  
558 available in the range of the EUCAST breakpoint (0.25  $\mu\text{g/mL}$ ), and thus only the CLSI  
559 breakpoint for NS (>1  $\mu\text{g/mL}$ ) was assessed. For *A. baumannii*, the EUCAST and CLSI  
560 breakpoints for ciprofloxacin NS are the same (>1  $\mu\text{g/mL}$ ). Due to the very limited range  
561 of MICs within the BD-Phoenix testing thresholds and thus the CIP MICs available for *K.*  
562 *pneumoniae* and *A. baumannii*, predictive models based on MICs were not generated for  
563 these species. For analyses in **Table S6** where datasets were down-sampled to equalize  
564 MIC distributions between datasets or the number of S and NS strains within datasets,

565 the required number of strains from the over-represented class(es) were selected at  
566 random for removal.

567 Model performance was assessed by sensitivity (1 – VME rate), specificity (1 – ME  
568 rate), and aggregate bACC (the average of the sensitivity and specificity (59)). bACC was  
569 used as an aggregate measure of model performance as, unlike metrics such as raw  
570 accuracy, error rate, and F1 score, it provides a balanced representation of false positive  
571 and false negative rates, even in the case of dataset imbalance. For MIC prediction  
572 models, the percentage of isolates with predicted MICs exactly matching the phenotypic  
573 MICs (rounding to the nearest doubling dilution, in the case of regression models), as well  
574 as the percentage of isolates with predicted MICs within one doubling dilution of  
575 phenotypic MICs (1-tier accuracy), were also assessed. In order to account for variations  
576 in MIC testing methods and thus in the dilutions assessed, criteria for exact match rates  
577 and 1-tier accuracies were relaxed to include predictions within 0.5 doubling dilutions or  
578 1.5 doubling dilutions, respectively, of the phenotypic MIC. Mean and 95% confidence  
579 intervals for all metrics were calculated across the 10 replicates for each analysis.  
580 Differential model performance between datasets or methods was evaluated by  
581 comparing mean bACC between sets of replicates by two-tailed unpaired t-tests with  
582 Welch's correction for unequal variance ( $\alpha=0.05$ ). Unless otherwise noted, all *P*-values  
583 are derived from these unpaired t-tests. Relationships between MIC prediction accuracy  
584 and bACC and between dataset imbalance and model performance were assessed by  
585 Pearson correlation ( $\alpha=0.05$ ).

586

587

588 **Acknowledgements**

589 We thank Jung-Eun Shin, Mark Labrador, and members of the Grad Lab for helpful  
590 discussion, and Julie Schillinger and Preeti Pathela for assistance identifying, selecting,  
591 and characterizing the isolates from New York City. The authors declare no competing  
592 interests.

593

594 **References:**

- 595 1. The Review on Antimicrobial Resistance. Tackling drug-resistant infections  
596 globally: final report and recommendations. London, United Kingdom; 2016.
- 597 2. Zumla A, Al-Tawfiq JA, Enne VI, Kidd M, Drosten C, Breuer J, et al. Rapid point  
598 of care diagnostic tests for viral and bacterial respiratory tract infections--needs,  
599 advances, and future prospects. *Lancet Infect Dis.* 2014;14(11):1123-35.
- 600 3. Didelot X, Bowden R, Wilson DJ, Peto TEA, Crook DW. Transforming clinical  
601 microbiology with bacterial genome sequencing. *Nat Rev Genet.* 2012;13(9):601-12.
- 602 4. Walker TM, Kohl TA, Omar SV, Hedge J, Del Ojo Elias C, Bradley P, et al.  
603 Whole-genome sequencing for prediction of *Mycobacterium tuberculosis* drug  
604 susceptibility and resistance: a retrospective cohort study. *Lancet Infect Dis.*  
605 2015;15(10):1193-202.
- 606 5. Rigouts L, Gumusboga M, de Rijk WB, Nduwamahoro E, Uwizeye C, de Jong B,  
607 et al. Rifampin resistance missed in automated liquid culture system for *Mycobacterium*  
608 *tuberculosis* isolates with specific *rpoB* mutations. *J Clin Microbiol.* 2013;51(8):2641-5.
- 609 6. Mason A, Foster D, Bradley P, Golubchik T, Doumith M, Gordon NC, et al.  
610 Accuracy of Different Bioinformatics Methods in Detecting Antibiotic Resistance and

- 611 Virulence Factors from *Staphylococcus aureus* Whole-Genome Sequences. *J Clin*  
612 *Microbiol.* 2018;56(9).
- 613 7. Yang Y, Niehaus KE, Walker TM, Iqbal Z, Walker AS, Wilson DJ, et al. Machine  
614 learning for classifying tuberculosis drug-resistance from DNA sequencing data.  
615 *Bioinformatics.* 2018;34(10):1666-71.
- 616 8. Pesesky MW, Hussain T, Wallace M, Patel S, Andleeb S, Burnham CD, et al.  
617 Evaluation of Machine Learning and Rules-Based Approaches for Predicting  
618 Antimicrobial Resistance Profiles in Gram-negative Bacilli from Whole Genome  
619 Sequence Data. *Front Microbiol.* 2016;7:1887.
- 620 9. Li Y, Metcalf BJ, Chochua S, Li Z, Gertz RE, Jr., Walker H, et al. Validation of  
621 beta-lactam minimum inhibitory concentration predictions for pneumococcal isolates  
622 with newly encountered penicillin binding protein (PBP) sequences. *BMC Genomics.*  
623 2017;18(1):621.
- 624 10. Bradley P, Gordon NC, Walker TM, Dunn L, Heys S, Huang B, et al. Rapid  
625 antibiotic-resistance predictions from genome sequence data for *Staphylococcus*  
626 *aureus* and *Mycobacterium tuberculosis*. *Nat Commun.* 2015;6:10063.
- 627 11. Drouin A, Giguere S, Deraspe M, Marchand M, Tyers M, Loo VG, et al.  
628 Predictive computational phenotyping and biomarker discovery using reference-free  
629 genome comparisons. *BMC Genomics.* 2016;17(1):754.
- 630 12. Drouin A, Letarte G, Raymond F, Marchand M, Corbeil J, Laviolette F.  
631 Interpretable genotype-to-phenotype classifiers with performance guarantees. *Sci Rep.*  
632 2019;9(1):4071.

- 633 13. Davis JJ, Boisvert S, Brettin T, Kenyon RW, Mao C, Olson R, et al. Antimicrobial  
634 Resistance Prediction in PATRIC and RAST. *Sci Rep.* 2016;6:27930.
- 635 14. Nguyen M, Brettin T, Long SW, Musser JM, Olsen RJ, Olson R, et al. Developing  
636 an in silico minimum inhibitory concentration panel test for *Klebsiella pneumoniae*. *Sci*  
637 *Rep.* 2018;8(1):421.
- 638 15. Nguyen M, Long SW, McDermott PF, Olsen RJ, Olson R, Stevens RL, et al.  
639 Using machine learning to predict antimicrobial minimum inhibitory concentrations and  
640 associated genomic features for nontyphoidal *Salmonella*. *J Clin Microbiol.* 2018.
- 641 16. Santerre JW, Davis JJ, Xia F, Stevens R. Machine Learning for Antimicrobial  
642 Resistance. *arXiv e-prints.* 2016.
- 643 17. Moradigaravand D, Palm M, Farewell A, Mustonen V, Warringer J, Parts L.  
644 Prediction of antibiotic resistance in *Escherichia coli* from large-scale pan-genome data.  
645 *PLoS Comput Biol.* 2018;14(12):e1006258.
- 646 18. Gordon NC, Price JR, Cole K, Everitt R, Morgan M, Finney J, et al. Prediction of  
647 *Staphylococcus aureus* antimicrobial resistance by whole-genome sequencing. *J Clin*  
648 *Microbiol.* 2014;52(4):1182-91.
- 649 19. Marchland M, Shawe-Taylor J. The set covering machine. *Journal of Machine*  
650 *Learning Research.* 2002;3:723-46.
- 651 20. Breiman L. Random forests. *Machine Learning.* 2001;45:5-32.
- 652 21. Hemarajata P, Yang S, Soge OO, Humphries RM, Klausner JD. Performance  
653 and Verification of a Real-Time PCR Assay Targeting the *gyrA* Gene for Prediction of  
654 Ciprofloxacin Resistance in *Neisseria gonorrhoeae*. *J Clin Microbiol.* 2016;54(3):805-8.

- 655 22. Siedner MJ, Pandori M, Castro L, Barry P, Whittington WL, Liska S, et al. Real-  
656 time PCR assay for detection of quinolone-resistant *Neisseria gonorrhoeae* in urine  
657 samples. *J Clin Microbiol.* 2007;45(4):1250-4.
- 658 23. Grad YH, Harris SR, Kirkcaldy RD, Green AG, Marks DS, Bentley SD, et al.  
659 Genomic Epidemiology of Gonococcal Resistance to Extended-Spectrum  
660 Cephalosporins, Macrolides, and Fluoroquinolones in the United States, 2000-2013. *J*  
661 *Infect Dis.* 2016;214(10):1579-87.
- 662 24. Wadsworth CB, Arnold BJ, Sater MRA, Grad YH. Azithromycin Resistance  
663 through Interspecific Acquisition of an Epistasis-Dependent Efflux Pump Component  
664 and Transcriptional Regulator in *Neisseria gonorrhoeae*. *MBio.* 2018;9(4).
- 665 25. Yakkala H, Samantarrai D, Gribskov M, Siddavattam D. Comparative genome  
666 analysis reveals niche-specific genome expansion in *Acinetobacter baumannii* strains.  
667 *PLoS One.* 2019;14(6):e0218204.
- 668 26. Holt KE, Wertheim H, Zadoks RN, Baker S, Whitehouse CA, Dance D, et al.  
669 Genomic analysis of diversity, population structure, virulence, and antimicrobial  
670 resistance in *Klebsiella pneumoniae*, an urgent threat to public health. *Proc Natl Acad*  
671 *Sci U S A.* 2015;112(27):E3574-81.
- 672 27. Harris SR, Cole MJ, Spiteri G, Sanchez-Buso L, Golparian D, Jacobsson S, et al.  
673 Public health surveillance of multidrug-resistant clones of *Neisseria gonorrhoeae* in  
674 Europe: a genomic survey. *Lancet Infect Dis.* 2018;18(7):758-68.
- 675 28. Yahara K, Nakayama SI, Shimuta K, Lee KI, Morita M, Kawahata T, et al.  
676 Genomic surveillance of *Neisseria gonorrhoeae* to investigate the distribution and

- 677 evolution of antimicrobial-resistance determinants and lineages. *Microb Genom.*  
678 2018;4(8).
- 679 29. Eyre DW, De Silva D, Cole K, Peters J, Cole MJ, Grad YH, et al. WGS to predict  
680 antibiotic MICs for *Neisseria gonorrhoeae*. *J Antimicrob Chemother.* 2017;72(7):1937-  
681 47.
- 682 30. Demczuk W, Martin I, Peterson S, Bharat A, Van Domselaar G, Graham M, et al.  
683 Genomic Epidemiology and Molecular Resistance Mechanisms of Azithromycin-  
684 Resistant *Neisseria gonorrhoeae* in Canada from 1997 to 2014. *J Clin Microbiol.*  
685 2016;54(5):1304-13.
- 686 31. Niehaus KE, Walker TM, Crook DW, Clifton TEAPA. Machine learning for the  
687 prediction of antibacterial susceptibility in *Mycobacterium tuberculosis*. *IEEE-EMBS*  
688 *International Conference on Biomedical and Health Informatics (BHI)2014.* p. 618-21.
- 689 32. Humphries RM, Ambler J, Mitchell SL, Castanheira M, Dingle T, Hindler JA, et al.  
690 CLSI Methods Development and Standardization Working Group Best Practices for  
691 Evaluation of Antimicrobial Susceptibility Tests. *J Clin Microbiol.* 2018;56(4).
- 692 33. Olesen SW, Torrone EA, Papp JR, Kirkcaldy RD, Lipsitch M, Grad YH.  
693 Azithromycin susceptibility in *Neisseria gonorrhoeae* and seasonal macrolide use. *J*  
694 *Infect Dis.* 2018;jiy551.
- 695 34. Unemo M, Shafer WM. Antibiotic resistance in *Neisseria gonorrhoeae*: origin,  
696 evolution, and lessons learned for the future. *Ann N Y Acad Sci.* 2011;1230:E19-28.
- 697 35. Andre E, Goeminne L, Colmant A, Beckert P, Niemann S, Delmee M. Novel rapid  
698 PCR for the detection of Ile491Phe *rpoB* mutation of *Mycobacterium tuberculosis*, a

- 699 rifampicin-resistance-conferring mutation undetected by commercial assays. *Clin*  
700 *Microbiol Infect.* 2017;23(4):267 e5- e7.
- 701 36. Lees JA, Vehkala M, Valimaki N, Harris SR, Chewapreecha C, Croucher NJ, et  
702 al. Sequence element enrichment analysis to determine the genetic basis of bacterial  
703 phenotypes. *Nat Commun.* 2016;7:12797.
- 704 37. Zhou X, Stephens M. Genome-wide efficient mixed-model analysis for  
705 association studies. *Nat Genet.* 2012;44(7):821-4.
- 706 38. Farhat MR, Shapiro BJ, Kieser KJ, Sultana R, Jacobson KR, Victor TC, et al.  
707 Genomic analysis identifies targets of convergent positive selection in drug-resistant  
708 *Mycobacterium tuberculosis*. *Nat Genet.* 2013;45(10):1183-9.
- 709 39. Prideaux B, Via LE, Zimmerman MD, Eum S, Sarathy J, O'Brien P, et al. The  
710 association between sterilizing activity and drug distribution into tuberculosis lesions.  
711 *Nat Med.* 2015;21(10):1223-7.
- 712 40. Tamma PD, Wu H, Gerber JS, Hsu AJ, Tekle T, Carroll KC, et al. Outcomes of  
713 children with enterobacteriaceae bacteremia with reduced susceptibility to ceftriaxone:  
714 do the revised breakpoints translate to improved patient outcomes? *Pediatr Infect Dis J.*  
715 2013;32(9):965-9.
- 716 41. Bhat SV, Peleg AY, Lodise TP, Jr., Shutt KA, Capitano B, Potoski BA, et al.  
717 Failure of current cefepime breakpoints to predict clinical outcomes of bacteremia  
718 caused by gram-negative organisms. *Antimicrob Agents Chemother.* 2007;51(12):4390-  
719 5.
- 720 42. Tam VH, Gamez EA, Weston JS, Gerard LN, Larocco MT, Caeiro JP, et al.  
721 Outcomes of bacteremia due to *Pseudomonas aeruginosa* with reduced susceptibility to



- 722 piperacillin-tazobactam: implications on the appropriateness of the resistance  
723 breakpoint. *Clin Infect Dis*. 2008;46(6):862-7.
- 724 43. Colangeli R, Jedrey H, Kim S, Connell R, Ma S, Chippada Venkata UD, et al.  
725 Bacterial Factors That Predict Relapse after Tuberculosis Therapy. *N Engl J Med*.  
726 2018;379(9):823-33.
- 727 44. Chen ML, Doddi A, Royer J, Freschi L, Schito M, Ezewudo M, et al. Deep  
728 Learning Predicts Tuberculosis Drug Resistance Status from Whole-Genome  
729 Sequencing Data. *bioRxiv*. 2018.
- 730 45. Jeni LA, Cohn JF, De La Torre F. Facing Imbalanced Data--Recommendations  
731 for the Use of Performance Metrics. 2013 Humaine Association Conference on  
732 Affective Computing and Intelligent Interaction2013. p. 245-51.
- 733 46. US Food and Drug and Administration. Class II Special Controls Guidance  
734 Document: Antimicrobial Susceptibility Test (AST) Systems. Rockville, MD; 2009.
- 735 47. Jeukens J, Freschi L, Kukavica-Ibrulj I, Emond-Rheault JG, Tucker NP,  
736 Levesque RC. Genomics of antibiotic-resistance prediction in *Pseudomonas*  
737 *aeruginosa*. *Ann N Y Acad Sci*. 2017.
- 738 48. Bankevich A, Nurk S, Antipov D, Gurevich AA, Dvorkin M, Kulikov AS, et al.  
739 SPAdes: a new genome assembly algorithm and its applications to single-cell  
740 sequencing. *J Comput Biol*. 2012;19(5):455-77.
- 741 49. Gurevich A, Saveliev V, Vyahhi N, Tesler G. QUASt: quality assessment tool for  
742 genome assemblies. *Bioinformatics*. 2013;29(8):1072-5.
- 743 50. Altschul SF, Gish W, Miller W, Myers EW, Lipman DJ. Basic local alignment  
744 search tool. *J Mol Biol*. 1990;215(3):403-10.

- 745 51. Edgar RC. MUSCLE: multiple sequence alignment with high accuracy and high  
746 throughput. *Nucleic Acids Res.* 2004;32(5):1792-7.
- 747 52. Li H. Aligning sequence reads, clone sequences and assembly contigs with  
748 BWA-MEM. *arXiv e-prints.* 2013.
- 749 53. Walker BJ, Abeel T, Shea T, Priest M, Abouelliel A, Sakthikumar S, et al. Pilon:  
750 an integrated tool for comprehensive microbial variant detection and genome assembly  
751 improvement. *PLoS One.* 2014;9(11):e112963.
- 752 54. Wright MN, Ziegler A. ranger: A Fast Implementation of Random Forests for High  
753 Dimensional Data in C++ and R. *Journal of Statistical Software.* 2017;77:1-17.
- 754 55. Rizk G, Lavenier D, Chikhi R. DSK: k-mer counting with very low memory usage.  
755 *Bioinformatics.* 2013;29(5):652-3.
- 756 56. Earle SG, Wu CH, Charlesworth J, Stoesser N, Gordon NC, Walker TM, et al.  
757 Identifying lineage effects when controlling for population structure improves power in  
758 bacterial association studies. *Nat Microbiol.* 2016;1:16041.
- 759 57. The European Committee on Antimicrobial Susceptibility Testing. Breakpoint  
760 tables for interpretation of MICs and zone diameters. Version 8.1, 2018. [Available  
761 from: <http://www.eucast.org/>.
- 762 58. Clinical and Laboratory Standards Institute. CLSI M100: Performance Standards  
763 for Antimicrobial Susceptibility Testing, 29th Edition. 2019.
- 764 59. Bekkar M, Djemaa HK, Alitouche TA. Evaluation Measures for Models  
765 Assessment over Imbalanced Data Sets. *Journal of Information Engineering and  
766 Applications.* 2013;3(10):27-38.

- 767 60. De Silva D, Peters J, Cole K, Cole MJ, Cresswell F, Dean G, et al. Whole-  
768 genome sequencing to determine transmission of *Neisseria gonorrhoeae*: an  
769 observational study. *Lancet Infect Dis*. 2016;16(11):1295-303.
- 770 61. Demczuk W, Lynch T, Martin I, Van Domselaar G, Graham M, Bharat A, et al.  
771 Whole-genome phylogenomic heterogeneity of *Neisseria gonorrhoeae* isolates with  
772 decreased cephalosporin susceptibility collected in Canada between 1989 and 2013. *J*  
773 *Clin Microbiol*. 2015;53(1):191-200.
- 774 62. Grad YH, Kirkcaldy RD, Trees D, Dordel J, Harris SR, Goldstein E, et al.  
775 Genomic epidemiology of *Neisseria gonorrhoeae* with reduced susceptibility to cefixime  
776 in the USA: a retrospective observational study. *Lancet Infect Dis*. 2014;14(3):220-6.
- 777 63. Lee RS, Seemann T, Heffernan H, Kwong JC, Goncalves da Silva A, Carter GP,  
778 et al. Genomic epidemiology and antimicrobial resistance of *Neisseria gonorrhoeae* in  
779 New Zealand. *J Antimicrob Chemother*. 2018;73(2):353-64.
- 780 64. Lesho EP, Waterman PE, Chukwuma U, McAuliffe K, Neumann C, Julius MD, et  
781 al. The antimicrobial resistance monitoring and research (ARMoR) program: the US  
782 Department of Defense response to escalating antimicrobial resistance. *Clin Infect Dis*.  
783 2014;59(3):390-7.

784

785 **Table and figure legends:**

786

787 **Table 1.** Summary of datasets.

| Species               | Dataset | SRA Study ID/Reference               | N <sub>samples</sub> | Temporal range | Geographic range  | Sampling approach                                   |
|-----------------------|---------|--------------------------------------|----------------------|----------------|-------------------|-----------------------------------------------------|
| <i>N. gonorrhoeae</i> | 1       | ERP011192                            | 886                  | 2011-2015      | New York, NY (US) | Survey from citywide clinics                        |
|                       | 2       | ERP008891, ERP001405, ERP000144 (23) | 1102                 | 2000-2013      | National (US)     | Survey from nationwide clinics; male patients only; |

|                      |   |                                                            |      |           |                                |                                                                                                                                                                                                                              |
|----------------------|---|------------------------------------------------------------|------|-----------|--------------------------------|------------------------------------------------------------------------------------------------------------------------------------------------------------------------------------------------------------------------------|
|                      |   |                                                            |      |           |                                | enriched for CFX resistance                                                                                                                                                                                                  |
|                      | 3 | SRP065041, ERP000144, ERP001405, ERP008891, SRP072971 (29) | 671  | 2004-2014 | International (UK, Canada, US) | Surveys from Brighton, UK (60) and nationwide sites in Canada (30, 61) and the US (23, 62); Canadian samples enriched for CRO and AZM resistance; US samples enriched for CFX resistance; US samples from male patients only |
|                      | 4 | SRP050190, SRP065041 (30, 61)                              | 383  | 1989-2014 | National (Canada)              | Surveys from nationwide sites in Canada; enriched for CRO and AZM resistance                                                                                                                                                 |
|                      | 5 | ERP010312 (27)                                             | 714  | 2013      | International (Europe)         | Survey from clinics and hospitals across 21 European countries                                                                                                                                                               |
|                      | 6 | DRP004052 (28)                                             | 204  | 2015      | National (Japan)               | Survey from clinics in Kyoto and Osaka; male patients only                                                                                                                                                                   |
|                      | 7 | SRP111927 (63)                                             | 398  | 2014-2015 | National (New Zealand)         | Survey from nationwide diagnostic labs                                                                                                                                                                                       |
| <i>K. pneumoniae</i> | 8 | SRP102664 (14)                                             | 1560 | 2011-2017 | Houston, TX (US)               | Survey from citywide hospital system; enriched for $\beta$ -lactam resistance                                                                                                                                                |
| <i>A. baumannii</i>  | 9 | SRP065910 (64)                                             | 702  | 2000-2012 | National (US)                  | Survey from clinics and hospitals within the US military healthcare system                                                                                                                                                   |

788 CFX, cefixime; CRO, ceftriaxone; AZM, azithromycin  
789

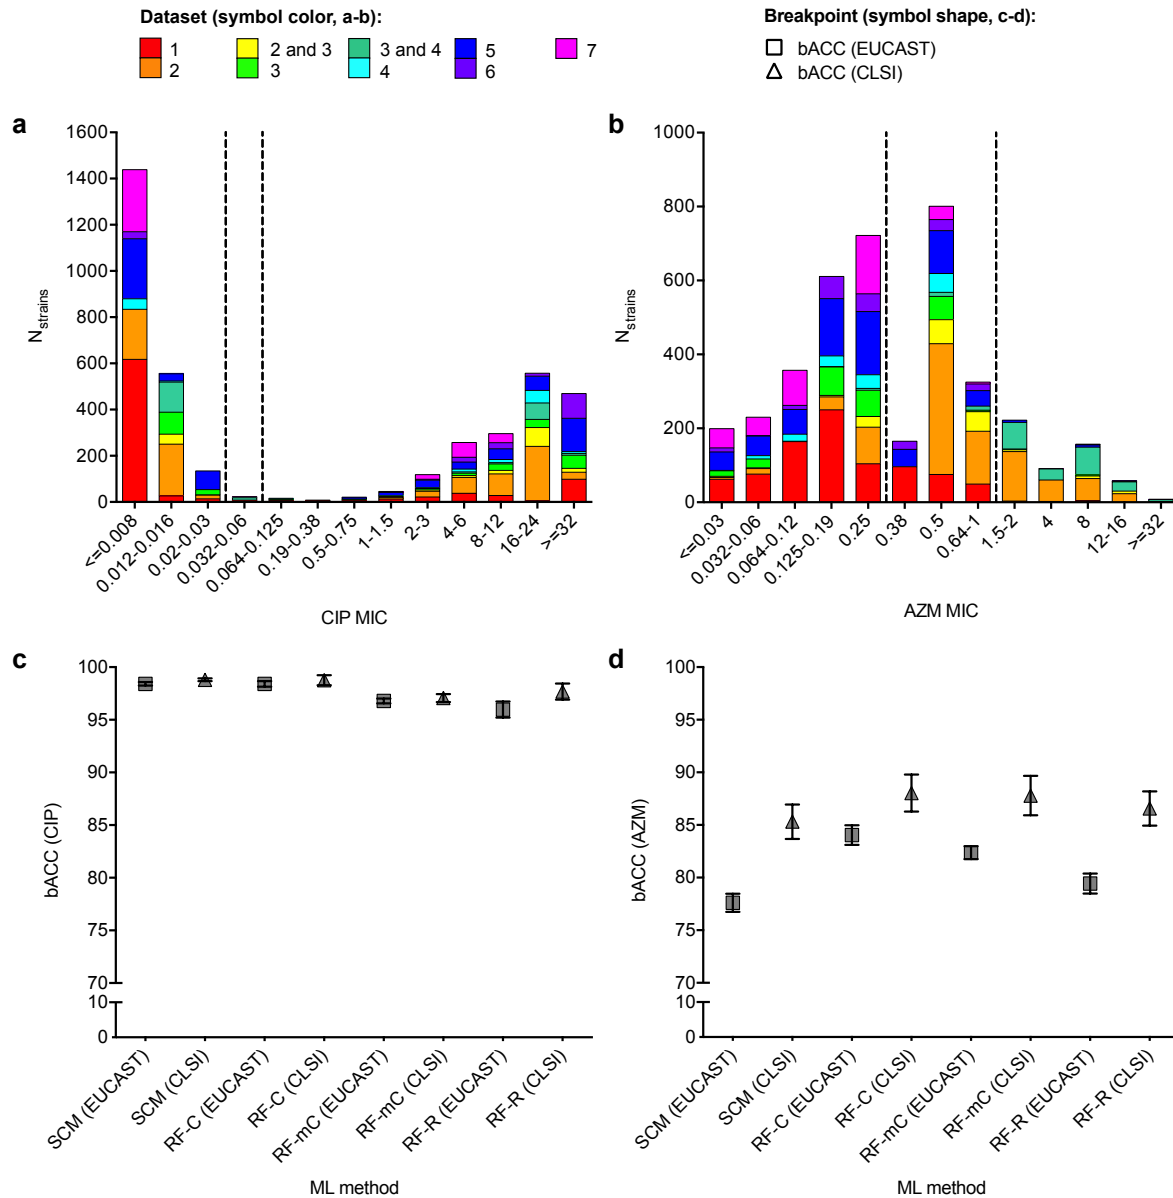

790

791 **Figure 1. Differential performance of machine learning-based prediction models for**

792 **ciprofloxacin and azithromycin resistance in gonococci.** Histograms showing the

793 distributions of **(a)** ciprofloxacin (CIP) and **(b)** azithromycin (AZM) minimum inhibitory

794 concentrations (MICs) in the gonococcal isolates assessed here. Bar color indicates the

795 study or studies associated with the isolates. Dashed lines indicate the **(a)** EUCAST and

796 CLSI breakpoints for non-susceptibility (NS,  $>0.03 \mu\text{g/mL}$  and  $>0.06 \mu\text{g/mL}$ , respectively)

797 for CIP and the **(b)** EUCAST and CLSI breakpoints for non-susceptibility ( $>0.25 \mu\text{g/mL}$   
798 and  $>1 \mu\text{g/mL}$ , respectively) for AZM. Note that there was some overlap in strains from  
799 the US between datasets 2 and 3 and in strains from Canada between datasets 3 and 4;  
800 such strains are indicated in **(a)** and **(b)** as belonging to datasets 2 and 3 and 3 and 4,  
801 respectively. Mean balanced accuracy (bACC) with 95% confidence intervals of predictive  
802 models for **(c)** CIP NS and **(d)** AZM NS trained and tested on the aggregate gonococcal  
803 dataset. Symbol colors in **(a-b)** indicate the datasets from which the training and testing  
804 sets were derived. Symbol shapes in **(c-d)** indicate the NS breakpoint. SCM, set covering  
805 machine; RF-C, random forest classification; RF-mC, random forest multi-class  
806 classification; RF-R, random forest regression.

807

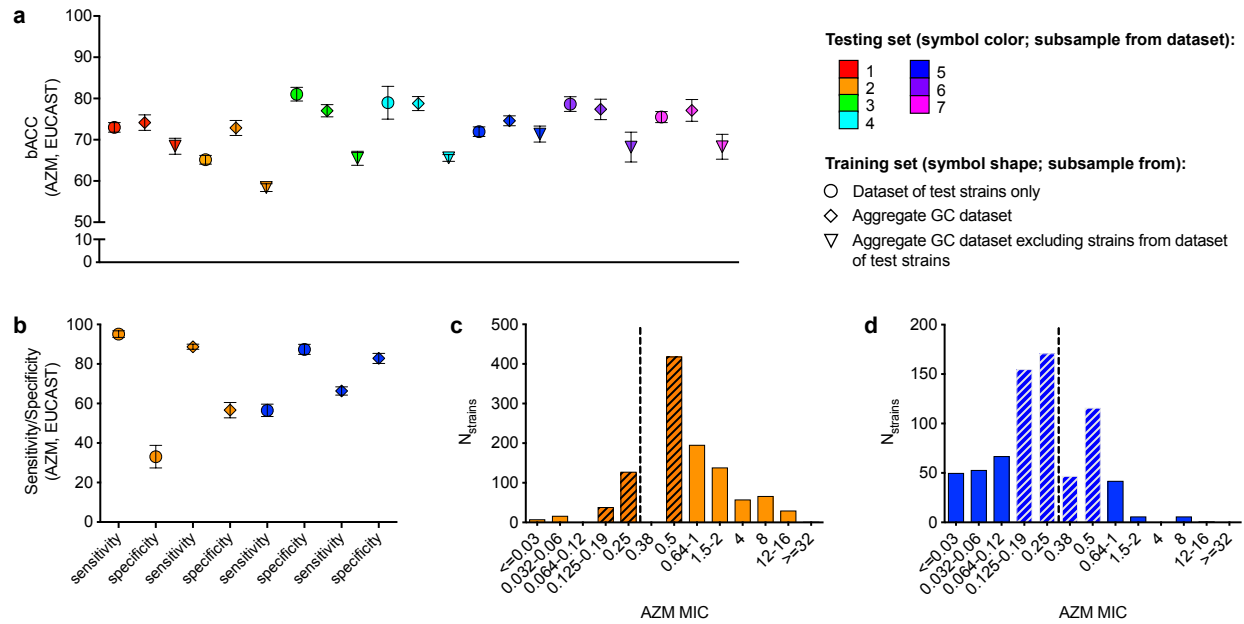

808

809 **Figure 2. Differential performance of random forest classifiers across different**

810 **datasets. (a) Mean balanced accuracy (bACC) with 95% confidence intervals of RF-C**

811 **predictive models for gonococci (GC) azithromycin (AZM) non-susceptibility based on the**

812 **EUCAST breakpoint. (b) Mean sensitivity and specificity with 95% confidence intervals of**

813 **RF-C predictive models for GC AZM non-susceptibility in datasets 2 and 5. Histograms**

814 **showing the distributions of AZM minimum inhibitory concentrations (MICs) in (c) dataset**

815 **2 and (d) dataset 5. Symbol colors in (a) and (b) indicate the dataset from which the**

816 **testing set was derived, while symbol shape in (a) and (b) indicates the dataset from**

817 **which the training set was derived. Hatching in (c) and (d) indicates MICs within one**

818 **doubling dilution of the EUCAST breakpoint (designated by dashed lines).**

819

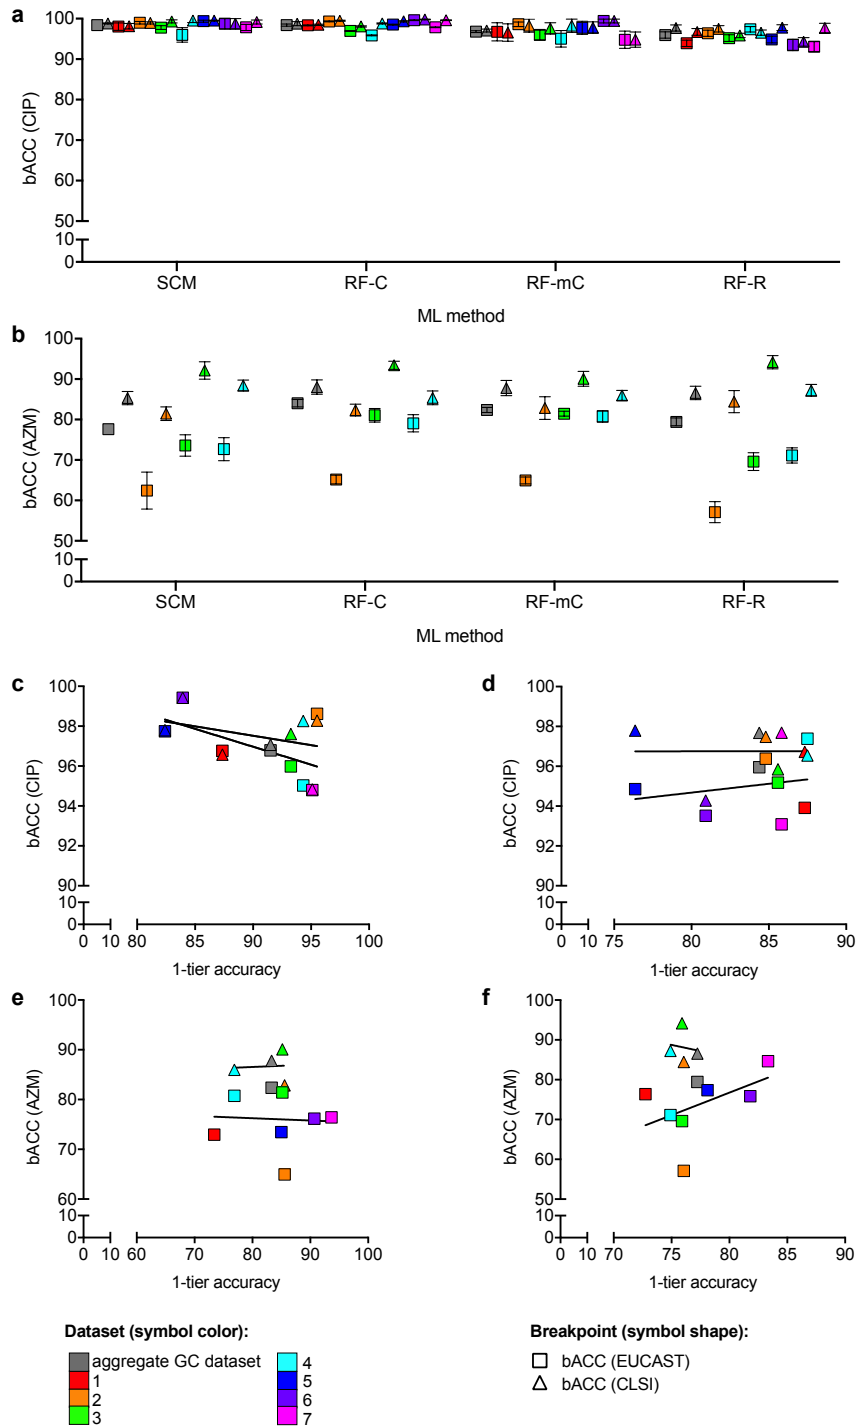

820

821 **Figure 3. Differential performance of machine learning-based prediction models**

822 **based on different resistance metrics in gonococci. Mean balanced accuracy (bACC)**

823 **with 95% confidence intervals of predictive models for (a) ciprofloxacin non-susceptibility**



824 (CIP NS) across all datasets and **(b)** azithromycin (AZM) NS for all datasets for which  
825 both NS breakpoints were evaluated. Scatter plots comparing the mean 1-tier accuracy  
826 to the mean bACC for each gonococcal dataset derived from **(c-d)** CIP and **(e-f)** AZM  
827 minimum inhibitory concentration (MIC) prediction models by **(c,e)** random forest multi-  
828 class classification and **d,f** random forest regression. Symbol colors in **(a-f)** indicate the  
829 datasets from which the training and testing sets were derived. Symbol shapes in **(a-f)**  
830 indicate the NS breakpoint. The line of best fit for each of the breakpoints is indicated in  
831 **(c-f)**. SCM, set covering machine; RF-C, random forest binary classification; RF-mC,  
832 random forest multi-class classification; RF-R, random forest regression.  
833

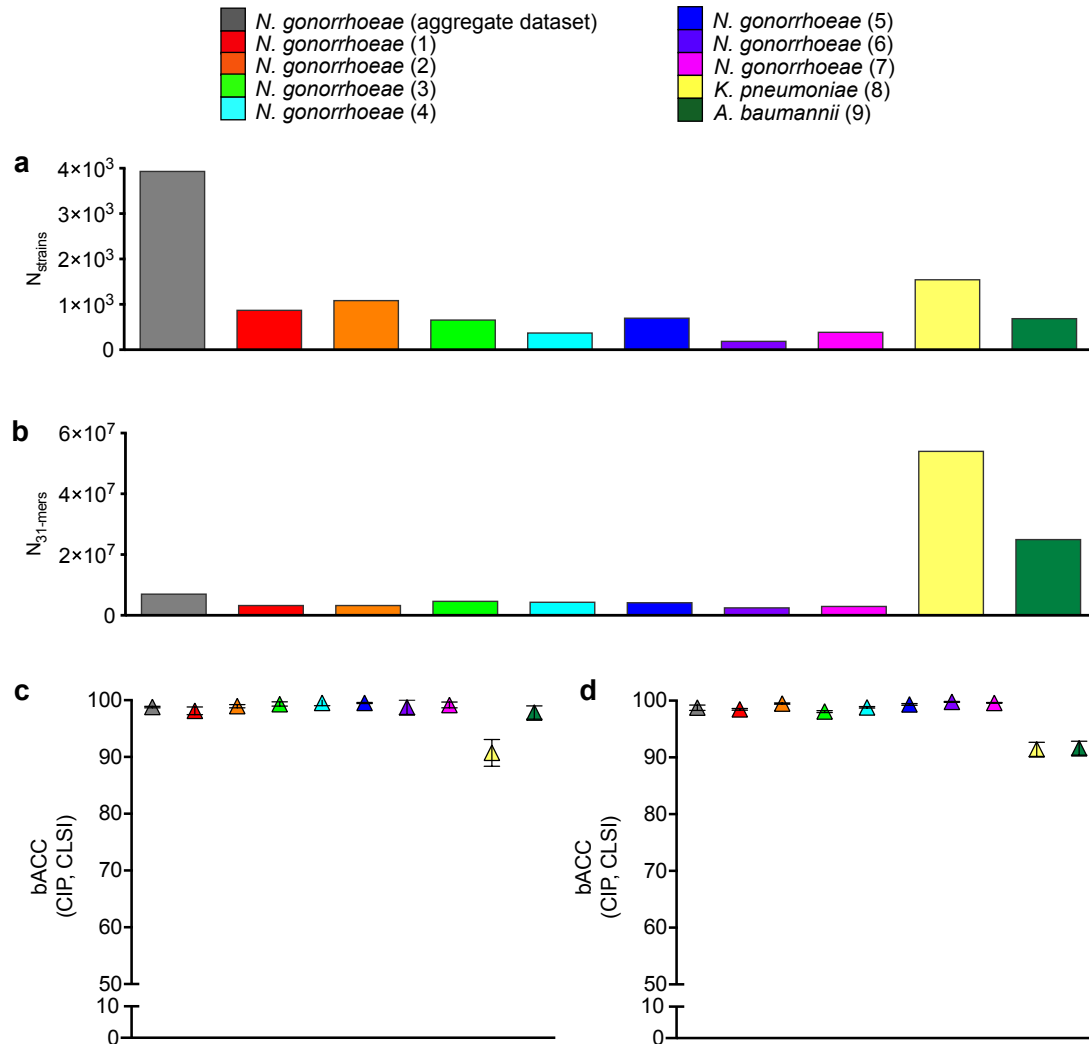

834

835 **Figure 4. *K. pneumoniae* and *A. baumannii* datasets are associated with higher**

836 **genetic diversity and lower performance of resistance prediction models. Number**

837 **of (a) strains and (b) unique 31-mers present in the genomes of at least two strains in**

838 **each dataset. Mean balanced accuracy (bACC) with 95% confidence intervals achieved**

839 **by c) set covering machine and d) random forest classification models for ciprofloxacin**

840 **(CIP) NS by the CLSI breakpoints across gonococcal, *K. pneumoniae*, and *A. baumannii***

841 **datasets.**

842

843 **Supplementary Tables and Figures**

844 **Table S1.** Genetic variants previously associated with ciprofloxacin resistance in *N.*  
845 *gonorrhoeae*.

846 **Table S2.** Genetic variants previously associated with azithromycin resistance in *N.*  
847 *gonorrhoeae*.

848 **Table S3.** Summary of approach in the primary set covering machine and random forest  
849 analyses.

850 **Table S4.** Performance (mean with 95% confidence intervals) of predictive models for  
851 ciprofloxacin resistance from the primary set covering machine and random forest  
852 analyses.

853 **Table S5.** Performance (mean with 95% confidence intervals) of predictive models for  
854 azithromycin resistance from the primary set covering machine and random forest  
855 analyses.

856 **Table S6.** Summary of approach in the additional random forest analyses for assessment  
857 of sampling bias.

858 **Table S7.** Study ID, machine learning dataset(s), antibiotic susceptibility testing (AST)  
859 methods, azithromycin (AZM) and ciprofloxacin (CIP) minimum inhibitory concentrations  
860 (MICs) for all strains assessed.

861 **Figure S1. MIC distribution influences classifier results but cannot explain all drug-**  
862 **specific classifier performance.** Histograms showing azithromycin (AZM) minimum  
863 inhibitory concentration (MIC) distributions for the aggregate gonococcal dataset after  
864 down-sampling to remove all strains with MICs  $\leq 2$  doubling dilutions of the **(a)** EUCAST  
865 or **(b)** CLSI breakpoint. **(c)** Mean balanced accuracy (bACC) with 95% confidence

866 intervals of SCM RF-C predictive models trained and tested on down-sampled aggregate  
867 gonococcal datasets.

868 **Figure S2. Dataset imbalance influences classifier results but cannot explain all**  
869 **dataset-specific classifier performance. (a)** Scatter plot showing the relationship  
870 between the ratio of azithromycin (AZM) non-susceptible (NS) strains to susceptible (S)  
871 strains (by the EUCAST breakpoint) in each dataset and the ratio of sensitivity to  
872 specificity achieved by set covering machine (SCM) and random forest binary  
873 classification (RF-C) methods. **(b)** Histogram showing the AZM minimum inhibitory  
874 concentration (MIC) distribution for both datasets 2 and 4 after down-sampling to equalize  
875 number of strains and MIC distributions between datasets. **(c)** Mean balanced accuracy  
876 (bACC) with 95% confidence intervals of RF-C predictive AZM NS models trained and  
877 tested on down-sampled datasets 2 and 4. Symbol colors in **(a)** indicated the machine  
878 learning (ML) method. Symbol colors **(b)** indicate the down-sampled dataset from which  
879 the training and testing sets were derived.

880 **Figure S3. Down-sampling to balance resistance phenotypes does ameliorate**  
881 **cross-species variation in classifier performance.** Number of **(a)** strains and **(b)**  
882 unique 31-mers present in the genomes of at least two strains in each dataset, after down-  
883 sampling the *K. pneumoniae* and *A. baumannii* datasets to equalize the number of S and  
884 NS strains within each dataset. Mean balanced accuracy (bACC) with 95% confidence  
885 intervals achieved by **(c)** set covering machine and **(d)** random forest classification models  
886 for ciprofloxacin (CIP) NS by the CLSI breakpoints across gonococcal, down-sampled *K.*  
887 *pneumoniae*, and down-sampled *A. baumannii* datasets.
